# Supplementary material
Source: publisher site journal article supplement (https://www.dovepress.com/get_supplementary_file.php?f=209571b.xlsx)
Supplement: Supplementary file 1 [file get_supplementary_file.php]

## Sheet: exprssion_data
ID	Pathway	L180628_B_I1	L180724_B_I26	L180628_A_I2	L180628_B_I6	L180724_B_I17	L180724_B_I25	L180731_B_I18	L180724_A_I34	L180724_A_I31	L180731_A_I9	L180807_A_I11	L180731_B_I2	L180628_A_I10	L180807_A_I9	L180731_A_I23	L180731_B_I12	L180716_A_I11	L180731_A_I12	L180724_B_I13	L180628_A_I7	L180731_B_I9	L180731_A_I16	L180807_A_I4	L180731_A_I19
MPO	Myeloid_marker	0	0	0	0	0	0.442821	23.0835	1.40456	0	0	0	1.35709	6.07261	35.3755	9.10401	22.817	6.30167	12.345	53.6173	26.387	58.8999	0	26.5689	64.8874
IL6	Cytokine_signaling	15.5886	41.6418	237.991	0	0	0.884786	15.0685	169.23	76.8966	0	0	28.4976	430.467	352.398	155.042	116.909	852.991	143.673	51.5405	168.878	295.308	361.466	63.024	250.445
CXCR2	Chemokine_signaling	105.521	10.1613	0	0	2.63585	0	0	73.0284	0	0	0	0	137.642	52.2475	100.419	62.3355	60.7675	0	59.6586	38.9212	21.6573	21.6813	153.235	14.9141
SNAI1	Tumor_marker	26.9802	142.06	233.996	41.7711	0	0	33.5031	102.521	0	35.2784	0	23.0692	344.779	640.03	118.902	95.0323	119.734	115.569	6.6079	84.4386	248.35	345.609	163.121	92.9727
SH2D1A	Lymphocyte_activation	58.7562	37.2582	253.401	0	0	0	48.0906	206.447	0	45.6964	0	7.46333	98.5083	129.802	55.4508	44.4584	162.496	52.2687	65.8888	187.349	16.7999	358.876	151.381	143.914
ADGRE5	Adhesion_migration	1370.58	1843.99	1613.43	1793.47	4015.11	4136.09	2745.49	2791.95	2030.55	2434.23	6094.85	2438.56	1339.98	1055.83	1437.31	1982.28	1753.25	1069.01	210.127	1478.34	1138.73	533.946	1512.58	3795.03
CORO1A	Lymphocyte_infiltrate	1168.53	2274.35	1087.8	1292.22	6098.43	3741.77	1633.8	4244.8	2943.69	4508.81	1467.8	3097.73	939.876	992.7	906.527	1079.7	1594.8	980.761	113.465	1421.61	1267.86	1020.97	1156.37	3732.85
BST2	Type_I_interferon_signaling	9588.67	9763.48	11045.8	27632	15692.8	7745.53	11571.2	17464.4	44526.3	27809.1	10637	36375.5	20952.6	5381.48	4976.24	8268.3	11613.3	4536.35	336.429	5788.02	12357	11781.1	6165.85	10399.2
S100A8	Myeloid_marker	312.368	414.624	142.68	43.3774	482.287	475.3	92.4942	1794.12	241.903	175.92	129.291	135.362	1215.83	2785.71	2020.79	3614.76	421.319	209.863	509.931	662.317	193.499	667.918	249.625	771.479
FCGR3B	NK_activation	19.186	34.8673	40.5216	19.8144	3.95286	2.21239	8.65651	577.911	21.6272	29.596	2.59726	21.3732	311.718	217.153	240.839	28.9334	99.4782	42.5505	70.0424	175.474	83.7957	53.7178	9.88622	73.7967
MTOR	PD_1_signaling	1964.74	1534.17	1417.1	2963.6	2756.68	1474.14	1102.88	1603.82	1441.01	2515.21	2339.07	1814.67	1245.52	857.183	948.736	1670.6	1201.84	709.436	689.662	739.499	1487.27	1460.75	1698.56	2051.98
POLR2A	Housekeeping	4648.35	2921.49	2483.78	2293.65	1228.12	4668.03	1724.53	3286.29	2546.39	1383.68	1669.81	1073.74	5475.3	4685.93	3715.21	1891.95	3276.48	2770.5	2966.13	3865.05	5311.1	5655.29	6829.15	1976.83
ZEB1	Tumor_marker	315.366	163.777	340.151	54.6238	768.234	227.914	303.612	765.397	182.629	170.711	0	308.721	692.256	2282.28	1562.28	703.57	574.812	403.441	177.277	410.98	1031.86	1367.55	377.835	301.967
KREMEN1	Neutrophil	475.447	48.8145	210.026	279.009	0	0.442821	55.3041	163.613	28.0352	17.5208	0	99.0623	303.621	227.494	147.318	109.146	53.1148	270.011	330.388	151.067	201.595	1925.76	54.9913	54.8151
OAS3	Interferon_signaling	935.905	727.434	761.344	1294.36	1292.69	854.125	989.063	2082.02	3158.36	1799.45	337.945	2835.83	1448.61	937.187	536.854	852.47	1039.79	250.837	71.5526	410.98	1198.64	714.517	307.706	960.33
VCAM1	Leukocyte_migration	285.388	70.1333	217.445	62.121	474.381	968.302	85.2807	434.662	108.937	90.2096	0.288702	93.6339	1192.89	1070.8	405.261	194.77	496.041	178.607	125.925	246.72	1009.19	1130.35	214.405	248.896
HMBS	Housekeeping	262.605	370.591	261.962	995.006	278.04	266.416	415.021	240.153	301.178	535.1	758.14	309.739	218.607	96.6035	160.008	447.641	127.836	313.875	76.0837	220.992	294.094	373.115	285.153	111.18
PRDM1	PD_1_signaling	758.436	236.102	2218.97	268.298	1616.85	825.801	288.864	2589.01	387.686	316.798	0	212.373	2294.7	2010.71	389.26	623.827	3519.1	1084.77	697.969	2248.18	1195.6	1460.42	937.946	1440.3
PTGS2	Tumor_marker	76.1432	155.011	642.633	83.0066	0	313.327	321.085	622.851	81.7027	12.5486	1962.45	246.977	648.4	377.433	362.5	581.016	1845.97	138.157	2824.35	314.667	385.581	8438.93	102.568	195.63
ICOS	Checkpoint_pathway	50.962	35.6643	115.286	0	0	0	8.97702	37.9192	0	4.49874	0.288702	5.7673	71.5195	167.899	1.93131	47.9869	73.3708	34.9332	4.90859	98.9519	69.0203	247.556	0	10.4597
TDO2	Checkpoint_pathway	23.9823	116.955	160.373	473.94	0	0.442821	48.7316	341.972	122.554	1.42046	0	25.1048	624.11	54.1523	277.807	39.0482	232.265	187.012	47.7647	112.145	167.186	259.53	25.951	64.1125
ITGAE	Adhesion_migration	137.897	79.2987	295.063	129.597	133.09	0	46.4876	94.0949	15.2193	46.1699	0	56.9945	139.666	147.218	57.6581	95.9734	129.637	149.977	87.0337	145.129	188.844	294.155	80.9429	357.17
CDKN3	Proliferation	247.616	118.749	1466.19	938.776	0	0	56.2661	228.215	68.8862	9.7077	0	6.10692	468.251	219.058	44.6919	51.2801	262.424	102.174	465.564	193.286	553.374	1001.23	51.2842	153.018
PVR	Checkpoint_pathway	1819.65	1447.7	2467.8	4835.79	1266.33	1547.16	1264.3	1346.82	1019.68	1439.56	1344.28	1387.21	1335.26	950.792	1113.71	748.028	538.802	335.413	2341.41	817.341	1322.51	1454.92	901.491	1940.22
CXCR4	Lymphocyte_infiltrate	2620.65	896.392	2681.82	374.332	3636.92	2254.36	430.09	3606.5	464.583	261.868	477.625	545.182	4680.49	9691.07	710.379	1102.52	6261.27	1333.25	1095.38	3000.88	2266.93	2209.89	888.825	1794.57
MKI67	Proliferation	320.162	324.566	1517.55	2397.55	954.034	0	157.416	493.647	268.337	242.215	0	84.8135	819.777	263.142	272.841	773.668	942.117	336.201	3162.29	564.025	829.454	3408.84	141.495	1310.53
GZMB	Lymphocyte_infiltrate	24.5818	0	1028.44	110.318	0	706.312	8.49602	391.125	46.4581	95.6553	0	48.1741	240.873	318.11	86.3489	129.846	794.925	216.954	105.158	225.61	8.90574	409.682	23.4796	2354.34
PIK3CA	PD_1_signaling	1430.54	614.065	1087.8	1056.06	404.541	2584.06	689.939	879.856	527.061	584.822	527.264	599.123	1066.05	1670.01	968.875	1206.02	924.111	1059.56	1380.64	928.167	1679.76	3639.57	789.346	1031.8
CD40LG	T_cell_receptor_signaling	50.3625	0	13.1267	0	371.599	0	0	54.0698	0	7.81314	0.86558	33.2467	33.0606	69.3912	37.7948	7.76273	95.8773	17.0726	0	87.737	62.3408	62.4559	48.8128	8.32878
IL1B	Type_II_interferon_signaling	131.303	75.9115	29.107	78.7224	1.31793	3.09804	31.9001	699.39	66.4835	3.78851	0	44.4424	1028.94	135.517	126.351	64.9234	162.946	49.642	16.2363	77.8418	145.732	144.974	27.1867	60.2387
LAPTM5	Lymphocyte_infiltrate	5320.45	1903.36	4180.54	447.699	7453.06	6624.55	993.231	6599.27	2275.66	711.73	874.444	1873.02	7720.75	15569.4	3003.73	2170.93	4824.46	2554.86	1580.58	6644.94	5459.26	6506.7	2860.18	4032.11
FASLG	Type_II_interferon_signaling	13.1901	20.7212	160.944	113.531	0	0	21.6406	72.3261	0	54.6938	0	61.4047	62.0734	41.9064	81.9352	27.9923	89.1253	11.8195	20.0121	82.46	61.531	20.7104	36.7638	369.566
CXCL8	Cytokine_signaling	278.793	1608.29	2115.1	1483.41	1308.5	976.711	570.034	3606.5	164.206	112.939	1311.09	239.174	42806.5	2260.51	884.181	621.71	2575.63	1381.57	4477.42	2218.5	3025.14	21057.8	345.706	152.824
MX1	Interferon_signaling	2488.15	1664.67	1127.18	5234.76	8853.8	8684.19	1466.12	8399.71	12090.4	5355.97	3167.62	12961.2	5587.98	3006.67	966.392	1399.14	3042.41	963.951	388.348	1063.4	11169.1	4572.84	1992.98	5178.77
IL21	Cytokine_signaling	0	0	47.3697	0	0	0	0	21.7678	0	0	0	0	6.74701	21.2256	9.93165	0	34.6595	0	0	28.3662	0	45.9517	0	9.68485
FCGR1A	B_cell_marker	196.054	59.7727	212.308	72.2958	1197.81	0	88.9677	414.298	98.5238	231.087	0	16.963	707.774	952.698	155.318	143.019	303.386	167.838	27.9413	440.005	295.106	254.676	159.722	185.945
MMP2	Tumor_marker	4637.55	2629.2	1843.43	396.289	4506.62	2385.35	2566.75	8547.87	859.478	5519.11	2267.78	1977.51	7890.1	9606.44	12309	4682	3403.41	5128.9	1177.31	5911.38	8533.78	1899.88	3728.92	1828.07
CCL21	Lymphocyte_infiltrate	542.597	1675.43	2367.36	747.593	6806.05	12717.6	1629.63	1627.7	420.527	2125.96	1408.35	1436.4	1476.95	144.769	2951.59	344.14	976.776	1105.79	570.722	2202.01	561.875	1374.02	668.24	1172.23
IL2RA	Cytokine_signaling	241.021	200.438	723.676	170.297	0	0	228.751	741.522	374.069	353.024	458.29	78.0287	686.184	561.931	177.94	345.316	537.452	606.737	101.571	778.42	817.715	454.986	176.406	583.016
FUT4	Myeloid_marker	642.123	258.218	814.421	92.1102	910.548	503.623	115.417	106.734	32.8413	174.973	0	42.0678	485.119	639.485	197.251	215.47	152.143	284.72	696.269	432.749	1283.25	504.174	315.429	224.297
CD33	Myeloid_marker	151.688	223.949	124.417	1.07117	0	891.741	282.612	327.225	208.261	217.355	0	163.521	518.18	443.558	325.257	167.953	231.816	193.315	60.0361	138.532	399.344	387.353	348.177	204.927
TWIST1	Tumor_marker	0.59947	40.8448	185.485	51.4102	723.432	0	27.2516	212.767	7.20885	298.567	0	18.3201	188.245	308.042	52.6923	375.896	321.841	99.2844	25.2982	168.218	460.471	156.947	44.4878	4.6487
TAP1	Type_II_interferon_signaling	875.349	389.32	11339.7	258.659	1337.49	1118.77	224.422	1560.29	194.644	885.519	0.86558	370.805	1437.82	1763.62	374.363	615.83	2361.82	910.368	732.707	2050.94	1343.97	3746.68	751.963	6182.87
NOS2	Innate_immune_response	17.9864	0	0	9117.85	0	0	0	239.45	0	0	0	0	0	0	0	0	0	0	0	0	0	0	0	0
CD63	Lymphocyte_infiltrate	14972.7	15653.3	6435.47	20903.2	26423	14506	14844	27291	10901.7	15896	13790	19762.6	17616.8	10810	13877.4	18090.5	10145.4	8655.33	4072.65	6140.28	8489.46	23807.2	16674.5	8901.16
VTCN1	Checkpoint_pathway	23.3828	0	0	0	0	0	2.72501	2.10684	0	2.36743	0	11.8742	1.34955	58.2342	0	0	3.60086	37.8225	0	0	73.6753	30.0947	1.23572	36.8015
TNFSF18	Checkpoint_pathway	108.519	20.9205	35.9557	161.193	0	15.4893	0	6.31955	11.2141	22.0196	0	0.33893	78.2665	336.07	26.76	66.8051	67.5189	79.3225	0	51.4548	64.7695	0.323633	103.804	31.9591
ZBTB46	Dendritic_cell	130.703	92.4485	51.3648	85.1485	860.475	213.31	136.257	199.424	293.168	248.135	237.514	151.308	116.725	51.431	172.422	82.3301	91.3758	171.778	32.2836	160.302	126.301	35.2729	118.325	83.0941
AXL	Innate_immune_response	550.991	557.68	589.556	156.374	2345.55	747.47	592.155	456.43	522.256	1306.73	624.809	556.716	512.107	736.633	448.298	615.124	190.404	390.833	69.4758	321.263	789.581	314.543	519.949	261.098
PDCD1LG2	Checkpoint_pathway	222.435	16.537	345.858	0	371.599	1.77043	22.6025	167.826	85.7073	56.351	0	0.33893	412.925	409.543	85.2457	183.008	230.465	314.663	0	91.0353	126.098	107.113	29.3495	170.45
S100A9	Myeloid_marker	1122.37	1148.23	212.308	115.674	777.458	291.641	282.292	2801.78	2423.04	277.731	791.329	214.069	1241.47	3875.83	1966.72	8029.54	2048.98	330.16	1205.44	256.615	313.322	1243.93	355.591	2158.32
PTEN	PD_1_signaling	3767.6	670.052	4160	993.935	2186.11	3825.41	431.212	1868.55	423.732	238.664	1279.92	827.78	3317.57	5608.15	3387.48	1276.35	2045.38	819.752	1755.59	2103.71	3835.97	22870	635.802	866.97
IRS1	Tumor_marker	453.263	470.013	2334.25	719.211	6.58871	1034.24	857.936	1264.66	149.788	633.596	1120.9	415.926	852.838	1359.52	1434.55	696.043	997.032	385.58	2694.65	1168.29	2001.17	36512.2	720.451	160.572
BCL2L11	Apoptosis	360.332	229.727	839.533	134.952	487.559	500.083	149.562	417.809	434.946	242.215	0	213.052	369.744	801.67	267.599	245.344	588.316	318.078	522.013	529.062	579.889	1293.44	273.104	858.254
CD3D	TCR_coexpression	703.877	628.012	2013.51	900.218	6535.92	5981.97	768.167	5140.1	1874.35	2273.7	3767.32	1542.59	1116.65	1078.96	612.168	1457.71	1917.99	1026.2	234.67	2452.68	1255.31	677.949	963.897	3895.75
CCR6	Chemokine_signaling	88.1344	83.8812	12.556	0.535587	43.4851	0	54.3421	128.503	44.0553	0	0.577403	76.332	32.3862	76.7385	19.3112	39.7539	137.739	1.83842	9.43969	114.125	149.577	319.073	188.454	61.2067
TNFSF4	Checkpoint_pathway	40.7698	0	123.846	46.5909	235.873	0	0	25.9815	0.800911	3.31502	0	12.2132	128.871	278.108	22.6218	53.8675	11.2529	9.98113	9.25094	85.7584	0	85.7554	26.8781	44.9366
VEGFA	Chemokine_signaling	3786.19	3425.38	10328.9	22159	3731.8	7084.81	23832.6	9482.5	11429.5	6938.3	12165.7	4246.45	46023.6	9848.62	4753.89	8132.34	7445.56	11534.8	28352	10085.2	17204.2	102239	4882.82	13709
GPR18	TCR_coexpression	63.5526	46.2243	131.837	4.28423	0	233.225	10.2595	78.6466	0	4.26199	0	0.678546	56.0015	72.3841	46.6228	6.58627	203.457	51.7433	9.62843	39.5805	12.1442	261.795	9.88622	23.0498
PTPN7	Lymphocyte_infiltrate	187.66	540.146	586.703	368.442	1001.47	801.903	543.424	1705.64	776.174	1257.72	838.37	1022.85	297.549	320.287	339.879	516.798	816.981	663.734	252.417	596.349	197.75	421.331	475.461	1341.9
CD40	Checkpoint_pathway	379.518	126.918	358.985	223.314	0	0.884786	81.4332	330.034	271.541	130.934	0	118.739	241.547	185.587	128.006	123.495	275.478	253.726	42.8561	106.868	324.657	452.074	152.308	204.54
CDKN2A	Tumor_marker	5.39581	9.36431	794.445	175.117	620.649	0	16.1905	33.7056	33.6422	423.582	0	625.245	23.6153	303.96	7.7243	137.139	45.9131	274.739	1567.17	345.671	495.487	2319.91	33.3658	209.576
HIF1A	PD_1_signaling	5389.99	1969.51	5605.63	1253.13	2515.54	2704.87	1178.06	2615.69	831.443	538.888	2812.36	505.149	7052.11	5786.94	1344.62	3039.86	2992.9	2080.77	3502.49	2558.89	2663.04	5425.21	1245.34	1553.61
IL2RG	Lymphocyte_infiltrate	631.93	976.886	1040.43	581.045	3146.73	1722.41	529.317	3324.91	1320.06	1291.11	1141.39	1095.79	773.222	1021.54	442.78	696.043	1335.98	742.794	195.212	954.554	546.088	1119.34	607.688	2588.51
TAGAP	Lymphocyte_infiltrate	562.982	129.109	217.445	0	5.27078	1736.13	140.585	1000.63	372.467	290.043	16.7384	286.67	571.482	921.676	169.939	187.478	1370.19	181.759	47.9534	459.796	476.056	571.807	481.64	429.417
FYB	Lymphocyte_infiltrate	753.64	492.328	1911.35	307.927	934.267	1767.99	568.431	2242.83	1395.35	309.222	906.767	572.661	972.263	3398.53	997.29	622.886	2213.28	1477.44	394.389	2229.71	1660.32	3035.08	525.509	1730.65
CCL3	Lymphocyte_infiltrate	512.019	227.933	436.032	56.7656	436.167	504.066	105.799	273.156	211.465	110.571	0	71.5829	1937.1	810.106	192.285	208.178	742.26	184.648	52.6733	343.033	447.719	197.722	231.397	517.16
CCL22	Chemokine_signaling	242.82	192.07	45.0868	65.8697	0	358.909	98.7462	309.67	915.549	258.316	1055.39	434.924	76.2426	60.4107	112.557	143.96	116.583	3.41467	0	78.5017	104.846	69.2512	118.016	85.8063
MAGEA12	Tumor_antigen	0	0	0	0	1.31793	0	0	0	0	0	0	0	0	38.0968	0	0	0	27.3163	3.20957	0	0	0	0	0
BAGE	Tumor_antigen	0	0	0	0	0	0	0	0	0	0	0	0	0	42.4512	0	0	0	7.87982	0	0	0	0.647266	0	0
HLA_E	Antigen_processing	8131.16	14012.3	13281.3	9333.13	28527.4	22743.2	16698	32916.3	18077.9	32647	11305.1	32283.8	8918.37	13164.7	18168.9	14479.1	21261.3	15905.7	2509.63	14234.5	8237.87	9723.31	17368.1	27173.6
DGAT2	Neutrophil	295.58	37.6569	945.116	216.352	0	361.122	16.8315	139.737	4.00521	38.5935	0	0.678546	100.532	29.1171	42.209	80.213	31.509	26.0029	279.98	245.4	152.41	270.208	319.445	93.7476
IL23A	Dendritic_cell_macrophage	0	3.38721	6.84871	0	0	0	0	2.10684	28.0352	0	0	0	16.8675	7.34739	0	6.82165	16.2048	37.2974	0	7.25664	4.25074	0	0	0
MAGEA4	Tumor_antigen	0	0	0	0	0	0	0	0	0	0	0	0	0	102.589	0	0	0	57.5218	0	0	0	0	0	0
IL1A	Cytokine_signaling	25.1812	5.18048	0	0	0	0	0	9.12867	31.2395	0	0	22.0517	89.7366	4.08197	40.5538	51.9858	17.1049	0	0	0	10.5253	66.6621	15.1383	0
PYGL	Neutrophil	537.201	365.411	2104.82	1140.67	21.084	363.777	622.452	564.568	595.948	253.817	0.288702	907.505	2109.83	877.32	821.281	651.82	407.365	404.754	1463.71	353.587	1006.56	224.58	681.216	886.92
GADD45GIP1	Apoptosis	1836.44	2856.54	3145.82	5381.49	2304.7	3761.24	3912.17	5499.63	5909.01	6855.91	1608.05	3177.79	3267.64	2918.78	4601.88	2962.47	2130	1678.11	1549.24	2163.08	2391.01	3569.99	3426.16	2505.22
CXCR6	Lymphocyte_infiltrate	127.705	68.1411	501.094	0	0	0	34.1441	139.737	162.604	52.3264	0	35.622	112.002	368.181	38.0708	20.7003	320.04	35.1961	3.77582	192.626	22.0622	75.3991	47.2679	387.967
RB1	Tumor_marker	1133.16	312.014	1457.62	205.106	366.328	1908.28	384.244	505.583	204.257	70.5575	433.47	107.883	766.475	1382.11	555.613	400.595	642.782	647.186	227.685	860.88	608.024	2729.27	349.104	545.827
AIF1	Macrophage	1246.47	935.842	396.081	711.713	2804.12	2336.67	1185.75	3843.14	1980.89	1641.05	2563.88	1144.3	1581.53	3014.29	1477.59	824.948	1440.41	356.425	213.148	693.981	779.46	2221.54	550.225	1075.19
CD68	Macrophage	3302.35	5854.54	2245.79	3705.3	14301.3	8456.27	7015.13	11181.1	9074.58	14300.2	14670.5	5672.33	9020.25	11992.1	4388.63	5303.94	4812.31	4590.98	1668.55	6577.65	4657.13	4705.52	3834.89	4840.19
TGFB1	Checkpoint_pathway	2828.1	2849.37	4895.09	1123	2603.83	195.608	2229.64	4033.43	1683.71	5574.98	1306.18	2015.17	5384.89	4186.05	2571.16	3244.75	2196.62	2208.68	932.827	4026.68	3089.5	5889.26	4778.4	3264.69
GAGE1,GAGE12I,GAGE12F	Tumor_antigen	0	0	0	0	0	0	0	0	0	0	0	0	0	134.156	0	0	0	20.4873	0	0	0	0	0	0
SSX2	Tumor_antigen	0	0	0	0	0	0	0	0	0	0	0	0	0	49.5262	0	0	0	0	0	0	0	0	15.4469	0
CD37	Lymphocyte_infiltrate	862.759	2210.4	374.394	363.622	2436.47	3171.77	2329.99	4221.62	2435.05	3300.1	2327.81	2251.97	1024.22	1938.59	970.806	1791.97	2332.11	1773.46	106.857	1341.13	987.532	542.683	1116.21	1823.23
HLA_DMA	Antigen_processing	7451.86	3622.43	5795.69	1841.67	10747.4	9734.8	6375.21	10422	9901.22	6963.17	7243.46	8038.63	4038.16	6542.07	3600.73	8495.3	6743.36	5822.05	336.241	4223.92	5801.93	3733.09	7626.22	6851.69
CIITA	Type_II_interferon_signaling	3490.61	1747.56	1730.43	1269.2	2703.97	4028.99	4802.64	4178.09	4579.35	3444.29	4036.3	1467.61	1756.28	2534.81	3295.88	2662.09	3110.83	1934.47	110.633	1982.33	2133.75	1496.67	2299.14	3739.82
LAMP3	TCR_coexpression	1799.26	443.315	139.256	76.58	421.672	1913.59	138.501	1282.22	3610.93	196.046	1432.88	910.559	86.3631	56.3295	3546.93	189.595	690.045	123.186	12.838	289.599	492.248	999.935	204.828	707.561
IRF9	Type_II_interferon_signaling	2332.27	1873.28	4596.03	2342.39	1656.38	3978.54	1007.02	4121.91	2672.95	1735.76	1005.18	2288.61	3295.3	4117.74	1339.38	2206.92	3364.7	4177.56	1464.66	2973.83	6272.52	5366.32	2255.58	3124.85
SNAI2	Tumor_marker	344.744	138.473	422.905	102.821	309.666	542.568	57.3881	319.501	29.637	175.446	0	43.0853	342.755	866.163	660.446	433.998	167.447	196.993	27.5638	276.405	561.065	145.621	156.015	131.905
TNFRSF9	Checkpoint_pathway	107.92	169.157	320.175	97.4656	0	311.113	12.183	220.491	31.2395	111.282	805.758	109.24	786.042	213.615	33.105	200.886	256.122	106.376	53.806	328.52	170.425	674.713	180.113	433.291
BCL2	Apoptosis	423.885	379.358	156.378	451.448	640.414	137.634	380.236	526.65	798.602	859.001	251.655	406.427	136.967	385.868	229.528	385.07	336.245	288.397	104.78	529.722	385.985	193.191	331.494	190.4
SH2D1B	Lymphocyte_activation	0	27.6946	0	0	0	0	13.1445	31.5987	0	17.9943	0	6.78478	0	5.44262	62.0719	30.3444	53.5651	0	0	0.65989	29.7533	147.563	0	97.6214
CD83	Antigen_presentation	334.552	184.698	237.42	141.379	0	304.032	64.4411	448.003	186.634	96.1288	328.999	275.475	1177.38	791.329	415.744	261.575	838.137	149.714	70.9864	135.234	244.505	628.761	212.243	97.4277
CD22	B_cell_marker	163.079	695.755	156.949	46.0553	422.99	1022.74	518.096	1231.66	916.35	517.342	268.105	738.556	97.1587	117.828	166.077	302.74	653.135	638.519	33.6051	569.962	191.475	319.396	371.348	220.617
EGR3	Tumor_marker	71.3469	200.239	301.341	59.9787	1.31793	1308.62	250.231	148.866	43.2544	85.4741	126.116	42.7464	1097.08	1952.2	355.879	140.432	986.679	283.407	0.188747	265.85	2159.86	137.855	171.771	237.468
CTLA4	Checkpoint_pathway	53.9599	47.8182	365.833	32.1315	422.99	0	37.8311	146.058	47.259	27.2285	0	57.673	91.7613	374.167	11.5869	104.206	212.46	81.9489	18.6906	267.83	180.342	94.4924	31.5122	185.171
GZMH	Lymphocyte_infiltrate	22.7828	47.8182	560.449	190.111	909.231	0	88.8072	303.35	237.097	384.988	0	109.918	156.534	337.43	159.18	143.49	446.076	126.863	39.0803	448.581	85.6171	217.461	163.121	1184.82
STAT1	Type_II_interferon_signaling	3454.03	3382.14	21798.2	11497.2	13755.7	6883	2562.43	16052.3	12567.8	13267.4	5521.7	13085	9114.03	5027.45	3076.01	4541.33	10379.5	9075.32	1849.61	6876.48	4352.91	5628.11	3231.22	21520.1
IL10	Checkpoint_pathway	117.512	26.6987	188.909	0	0	0	16.1905	73.0284	59.2746	14.2064	0	5.42837	157.208	313.756	62.3479	55.2789	91.3758	0	0	71.2451	109.298	94.8161	16.374	10.6528
HERC6	Dendritic_cell	410.095	278.342	318.463	232.418	462.522	399.624	255.041	990.804	985.236	187.048	492.921	574.018	653.123	589.687	300.704	186.066	383.509	147.351	24.9207	161.621	793.831	300.304	233.56	272.138
ZAP70	T_cell_receptor_signaling	52.761	238.493	147.817	196.538	148.903	686.397	372.702	295.626	197.047	526.103	645.3	462.404	81.64	175.246	109.523	237.817	344.797	188.85	48.5199	248.699	242.278	33.0074	228.308	550.669
IL12B	NK_activation	0	0	9.70234	0	0	0	0	0	0	0	0	0	0	29.6612	0	0	0	31.7814	0	0	22.0622	0	0	0
SLAMF8	Lymphocyte_infiltrate	767.43	1112.37	675.165	867.015	4758.31	788.184	850.722	2801.78	1347.29	3983.42	1019.03	868.83	1333.91	1572.59	1033.71	1158.03	1166.28	1564.38	184.073	963.13	839.17	259.53	763.394	1384.71
IFIH1	Innate_immune_response	655.912	103.008	675.735	266.692	0	469.547	76.6242	554.737	303.581	78.8441	0	267.672	692.256	932.289	288.014	153.84	554.107	140.522	103.836	133.915	446.505	1161.09	37.6908	278.531
FOXO1	PD_1_signaling	1644.58	1598.92	1393.13	432.169	2950.39	4267.97	2783	4874.67	1485.86	1986.03	2592.16	926.842	1506.64	6222.06	3439.34	3127.84	2663.4	3211.77	2576.65	3421.09	3926.45	949.776	1715.55	2232.51
M6PR	T_cell_regulation	3810.17	3563.85	4035.58	4979.31	3282.45	5203.08	3339.57	7106.96	3512.41	6265.88	2586.1	3522.48	4603.57	3824.12	3396.85	2739.71	3139.64	2521.77	1382.16	3681.66	3475.89	8602.35	2201.21	2904.43
IGSF6	Lymphocyte_infiltrate	318.364	134.688	129.554	51.4102	299.124	165.071	53.8616	702.2	230.689	111.755	0	96.3481	429.793	1467.28	172.422	260.869	313.288	95.6072	48.3312	186.689	342.267	194.162	245.608	80.7701
CDK1	Proliferation	344.744	147.639	1174.55	473.94	749.785	483.266	174.248	416.405	328.412	89.262	0	147.236	1045.81	283.551	211.596	111.263	482.086	320.966	1537.72	186.029	734.122	1607.34	146.747	568.295
G6PD	Housekeeping	577.371	483.761	653.477	244.735	1951.55	21.2426	340.481	412.893	334.019	544.808	687.146	583.857	174.076	1029.16	436.435	1163.44	1503.43	1332.72	376.454	1359.6	351.375	178.629	609.232	3053.18
CA4	Neutrophil	62.3536	97.629	0	0	0	515.13	0	14.7459	56.0703	0	2.59726	0	8.77096	10.3404	596.719	0	142.69	101.123	0	121.381	156.661	0	17.6097	38.545
CD38	Adhesion_migration	221.235	99.6212	639.78	19.8144	889.464	0.442821	79.9907	532.267	198.65	119.569	0.288702	454.261	298.898	234.569	158.904	13.4079	812.48	127.389	201.065	635.27	164.96	430.717	107.82	849.15
TRIM29	Tumor_marker	92.3312	0	0	0	0	0	207.43	454.323	136.171	255.475	0	0	0	939.635	188.147	224.173	55.8156	95.8697	0	219.013	0	0	75.073	1873.79
TNFRSF18	Cytokine_signaling	148.09	108.189	337.297	68.5471	287.265	0	62.0366	321.607	196.246	334.082	0	218.819	124.148	54.4239	39.7261	201.591	206.158	333.837	71.3639	323.902	493.462	369.879	292.259	155.148
CCL4	Lymphocyte_infiltrate	531.805	359.832	2504.9	184.756	2591.97	3479.34	470.005	2194.37	603.958	961.523	125.25	834.226	2035.61	4451.91	969.151	679.577	3998.93	1019.9	159.342	2041.04	1090.96	1023.23	686.159	4055.54
CD163	Macrophage	2359.25	4116.95	3567.01	327.742	2854.19	5479.67	1637.64	4159.83	1630.85	3845.38	0.288702	808.104	3382.34	9966.45	4114.41	3022.22	3111.28	4571.8	798.784	6882.42	5395.7	296.421	1648.82	2808.74
CCL20	Chemokine_signaling	293.182	1312.21	112.433	1570.16	291.217	0	444.196	2435.93	144.982	217.828	653.091	174.377	3080.07	815.549	425.4	1009.13	668.439	244.008	2406.55	573.92	223.859	578.603	232.324	132.486
BRCA2	Tumor_marker	358.533	52.4007	919.434	321.315	0	292.084	93.9367	118.672	31.2395	44.7494	751.214	99.7408	423.045	298.789	107.315	154.545	288.531	352.748	171.613	157.663	573.615	889.91	39.5444	124.157
CD160	Checkpoint_pathway	0	0	53.077	0	0	0	9.45801	46.3456	0	0	0	0	5.39745	0	0	0	52.2147	0	0	35.6228	19.8359	0	39.5444	72.2476
TNFRSF4	Checkpoint_pathway	121.11	162.184	71.911	57.3012	0	0.442821	71.4947	355.313	229.888	254.528	370.556	164.538	123.472	130.074	202.217	294.272	109.381	150.24	61.9242	212.416	257.459	146.268	161.267	78.058
CXCL1	Chemokine_signaling	146.891	1808.32	264.815	4346.32	0	1176.74	1709.62	4888.01	358.049	152.006	3006.3	691.4	5786.35	707.788	1157.57	1036.65	2174.11	519.798	254.682	2160.45	2753.31	21906	964.515	104.982
CD3E	TCR_coexpression	572.574	770.47	1093.5	530.706	944.809	2547.33	816.257	2914.13	652.018	2024.62	860.014	1318.34	576.881	1066.44	427.331	1212.37	1639.81	623.022	113.276	1550.9	501.356	573.425	730.337	2524.98
ISG20	Type_I_interferon_signaling	515.017	755.727	1562.64	673.155	1877.76	719.146	1165.55	2914.13	2089.02	5189.76	552.083	1288.15	746.233	658.262	355.052	917.158	1772.6	1447.24	368.902	1897.89	537.992	787.003	716.435	2649.72
ID2	T_cell_regulation	1701.54	523.211	1609.44	2504.65	930.315	4627.32	209.194	650.237	472.593	87.3681	988.439	323.309	2275.13	3824.12	1058.53	465.048	1234.7	464.115	627.36	1009.31	2016.96	2956.12	569.07	1172.42
CD226	Adhesion_migration	266.802	67.7424	263.103	0	0	1296.68	200.057	440.279	421.328	43.3289	66.0885	278.188	315.766	330.628	280.014	204.179	481.186	113.205	21.3337	332.478	220.621	118.439	139.951	442.395
EBI3	T_cell_regulation	10.7922	35.266	52.5063	24.6342	0	0	27.0911	125.694	7.20885	59.4293	0	46.1384	29.0127	131.435	14.6214	131.728	67.0692	122.923	0	81.1402	38.8615	0	78.1623	70.3104
SKAP2	B_cell_marker	1570.83	485.355	2733.19	983.225	980.387	2268.96	393.22	1496.39	861.881	187.995	0	746.359	2427.62	1444.69	1253.58	645.468	1612.81	637.731	557.506	854.943	955.147	7922.14	796.76	249.864
TYROBP	Lymphocyte_infiltrate	12019.9	4098.42	6756.78	1176.55	14390.9	19553.2	2406.13	8273.31	3351.4	3812.71	2926.93	1907.63	20689.4	38228.7	5416.26	3880.81	6591.21	3234.88	1533.76	10294.9	12492.8	11813.5	6376.55	3816.33
KLRG1	NK_activation	283.589	251.643	107.867	50.8751	1334.86	306.689	312.589	264.027	403.706	148.455	257.139	386.071	76.9177	230.487	343.465	218.057	181.401	217.742	66.644	137.873	243.291	229.111	250.86	108.468
B3GAT1	NK_activation	1054.02	966.924	51.3648	36.4157	0	283.233	190.278	574.399	289.163	119.569	0	1190.78	16.1931	31.566	15.7251	135.962	72.0204	0	178.787	0	578.473	0	665.151	440.458
ENTPD1	Checkpoint_pathway	752.441	410.439	518.216	64.7985	241.144	2278.7	370.778	368.654	99.3248	237.717	587.292	211.695	640.304	1420.75	607.202	642.646	649.534	859.151	74.1957	481.565	1276.77	292.862	547.135	263.81
STAT6	Helper_T_cells	2333.47	3312.21	869.781	2565.17	2323.15	3326.66	2951.48	3100.91	3175.18	3457.79	2280.19	2706.57	2486.32	1508.1	2976.14	2655.5	1851.82	1945.5	949.064	1980.35	2109.26	2669.08	4238.37	1354.69
HLA_B	Antigen_processing	63.5526	32.8751	60.4964	13.3883	54.0267	7407.87	14678.7	30075.2	62.4783	80.9754	14323	33599.7	19.5666	8471.96	30.0705	33.4025	20.256	32.044	29.2631	94.3337	8678.3	7218.3	248.698	51.5225
NFATC1	PD_1_signaling	141.495	57.5812	95.3107	57.3012	328.114	209.77	29.0146	145.355	52.0651	24.1503	190.185	34.6038	79.6161	248.991	158.904	37.6368	93.1765	0.262528	31.1508	4.61762	215.763	70.5457	32.748	45.5177
PECAM1	Adhesion_migration	50.3625	183.502	61.0672	150.483	2.63585	0	343.367	195.212	141.778	475.671	1513.68	134.006	217.933	90.0719	190.354	568.784	111.181	345.656	132.344	348.31	172.449	70.5457	253.332	119.896
PTK7	Tumor_marker	3487.61	646.94	1672.22	1898.97	2130.76	2855.78	1009.9	1528.69	1548.34	722.622	507.928	1288.49	1841.29	1401.97	1512.63	1123.92	636.48	2112.02	4353.19	1490.87	4756.51	4375.77	2149	942.316
CCR4	Chemokine_signaling	158.882	180.912	244.84	76.58	0	0	312.268	503.477	451.767	168.344	423.658	147.575	165.98	251.168	100.143	274.277	522.598	443.102	22.4664	350.289	316.763	242.055	153.544	127.256
KIR2DL1	Checkpoint_pathway	0	0	0	0	0	0	0	0	0	0	0	0	0	0	0	0	0.900055	0	0	0	0	0	0	7.55389
C10orf54	Checkpoint_pathway	1027.04	779.636	566.727	240.451	2810.71	1920.23	638.963	1452.85	1038.1	941.634	577.191	604.89	460.154	1238.97	1111.5	482.925	813.83	894.084	165.572	878.691	854.957	197.722	561.964	1341.9
BATF	Helper_T_cells	641.523	536.361	864.073	379.152	1101.62	616.917	2276.93	2796.86	2013.73	2464.3	755.254	1295.27	460.83	699.08	618.513	1810.79	1570.04	634.053	266.954	662.317	558.232	1670.12	1228.66	918.299
TNFSF13B	B_cell_marker	1110.37	201.036	2064.87	171.368	2450.97	1301.54	212.72	398.147	178.624	106.309	395.087	141.808	1570.73	2542.7	267.875	263.927	746.761	247.423	184.073	917.612	1090.35	4281.27	360.535	439.102
EIF2AK2	Type_II_interferon_signaling	3788.58	1410.44	4355.75	3171.38	2539.26	3355.87	826.036	2470.34	2166.72	885.756	1503.29	1998.55	5909.14	3777.05	1842.02	1776.21	2211.48	1862.5	2558.9	1533.09	5974.38	14886.4	1338.95	1730.84
LMNA	Housekeeping	4354.56	9622.22	5828.22	3464.31	10769.8	9299.33	14199.9	11818.7	7581.51	12113.9	10114.7	8925.44	3948.42	10450.8	8728.98	8693.36	9305.48	4695.52	2860.97	4600.6	14067.9	8580.67	5826.63	7190.08
IFI27	Type_I_interferon_signaling	3224.4	620.043	932.561	2248.14	844.662	3707.7	213.041	1913.49	8322.44	1559.84	873.29	4140.6	1931.71	2231.12	740.174	1366.68	1931.05	226.148	163.306	320.604	3617.58	4877.67	1360.58	500.115
TBX21	Type_II_interferon_signaling	13.1901	34.469	384.096	0	162.08	0	75.3417	167.123	33.6422	64.1648	0	82.0993	54.652	143.136	73.6588	52.6915	180.051	106.639	10.5725	125.999	56.2687	0	131.3	194.08
ARG1	Myeloid_marker	0	0	0	0	0	0	0	0	0	0	0	0	0	0	0	0	8.10242	0	0	0.65989	0	0	0	0
NTN3	B_cell_marker	84.537	98.0273	0	33.2026	0	0	71.1741	9.12867	0	15.3902	0	206.945	9.44612	2.44887	37.7948	35.99	18.9056	11.8195	74.7622	85.0985	91.0819	0	64.5689	16.8513
GATA3	Helper_T_cells	51.5614	59.7727	125.559	203.5	230.602	580.627	63.3191	199.424	33.6422	145.14	68.6858	111.614	59.375	261.781	103.177	152.899	180.501	44.3889	66.8328	61.3499	94.9277	0.970899	69.5118	103.819
CD19	B_cell_marker	0	196.055	19.9754	104.963	0	54.4336	248.468	523.841	61.6774	432.105	0.288702	131.292	12.8196	32.3825	5.79346	0	297.984	153.129	0	56.7323	0	0	86.5036	195.823
DMBT1	Innate_immune_response	5268.28	885.633	105.584	1859.34	0	1948.11	852.005	1110.88	199.45	1.42046	1685.69	4485.62	0	0	2731.72	1748.46	845.339	93.243	0	29.6854	474.639	177.982	7365.78	464.282
SAMHD1	Lymphocyte_infiltrate	2015.1	411.635	1181.39	257.052	711.572	1907.84	344.649	705.009	281.153	232.272	686.857	191.339	1482.35	3670.1	1223.78	350.726	979.927	389.257	152.167	555.449	1984.58	1397.64	378.453	718.02
GAGE13	Tumor_antigen	0	0	0	0	0	0	0	0	0	0	0	0	0	7.07495	0	0	0	0.525418	0	0	0	0	0	0
CD69	Checkpoint_pathway	835.779	121.139	251.118	10.1752	466.475	1195.77	143.15	577.208	175.42	40.0139	1142.84	135.702	586.326	1337.21	227.597	245.344	1556.99	318.34	18.6906	784.357	764.685	663.71	158.796	334.701
HLA_DRB1	Antigen_processing	56121.9	6.17643	15217.7	19382.8	31705.8	70180.2	80911.9	25482.8	75067.8	49890.3	22993.8	88131.1	25828.7	24677.6	12439.2	15.7604	54785.9	6.04104	2119.96	29497.5	33401.8	25115.8	82222	32948.1
CCR5	Lymphocyte_infiltrate	195.455	99.4219	1407.97	157.444	877.605	624.44	97.1427	438.875	157.798	82.3959	541.693	421.693	731.39	1013.65	369.122	254.518	472.634	220.369	47.5759	619.438	663.685	811.921	270.941	1086.42
GZMA	Lymphocyte_infiltrate	360.332	72.9229	855.513	129.597	72.4749	425.292	54.5026	826.489	112.141	93.0505	557.566	98.3838	317.115	853.917	226.77	289.567	550.055	138.157	40.213	242.762	222.241	667.27	150.145	1405.44
KIAA0101	Proliferation	133.101	112.173	522.211	784.545	533.679	250.484	107.082	306.159	474.996	141.115	0.288702	133.327	409.551	185.042	151.18	147.253	306.987	206.974	573.176	191.966	430.515	1033.91	88.0485	418.958
IL4	Cytokine_signaling	0	0	0	0	0	0	1.92351	7.72411	39.2492	17.2841	0	29.5151	10.1205	0	0	0	2.25046	0	0	0	0	0	25.3332	0
HGF	Cytokine_signaling	343.545	70.9303	26.8241	0	0	221.718	86.8837	108.841	58.4731	30.3068	0	74.636	120.099	284.639	456.022	74.8028	79.6725	13.6583	0	155.024	182.569	13.5915	68.8939	57.914
ITGB7	Leukocyte_migration	127.705	188.484	245.411	0	566.622	332.356	114.456	379.89	148.987	91.3933	15.2954	197.785	611.291	331.444	135.455	195.005	432.123	330.16	53.051	298.174	189.653	5.82435	434.372	483.651
ICAM1	Type_II_interferon_signaling	3775.99	1434.35	772.758	439.666	140.997	1369.7	2315.08	2951.34	1832.7	4105.12	1899.53	1654.88	3658.97	606.287	996.738	1476.53	1814.01	497.997	173.879	557.428	1088.94	2706.62	889.751	1132.33
LAG3	Checkpoint_pathway	20.3849	71.528	323.6	0	94.8759	363.335	58.6706	184.678	101.727	111.755	0	80.0637	128.195	175.79	57.9337	60.2188	313.739	159.433	10.3837	44.1987	15.1803	96.1106	143.349	1212.32
XAGE1B	Tumor_antigen	505.424	52.0024	13582.1	0	4637.08	0	710.298	47.7492	5106.41	832.246	473.008	2341.87	4342.46	106.127	71.4519	4461.59	3220.21	181.759	12529.6	1411.71	1999.35	62.7796	922.19	138.878
NOTCH3	Tumor_marker	2472.56	2791.19	1591.17	1963.77	2357.41	1332.52	3227.84	2197.18	1305.64	7507.26	2126.66	1915.77	3773	2384.87	2847.31	2534.59	1021.79	2410.14	3036.93	2986.36	3429.75	3553.17	2656.9	3725.68
IL17A	Helper_T_cells	0	0	0	0	0	0	0	23.1723	0	0	0	0	0	0	0	0	0	0	0	0	0	0	0	0
CXCR3	Chemokine_signaling	7.79428	3.18788	0	34.8089	0	0	0	7.02183	0	3.55176	0	0	8.77096	1.90476	1.65527	5.64562	4.05121	0	0	8.57589	4.25074	0	3.39847	14.9141
IL12A	Checkpoint_pathway	47.9646	30.0855	236.85	343.807	0	0	70.2122	91.2857	126.559	115.07	0	20.6946	110.653	34.5597	84.4181	19.5239	218.312	69.6039	0.188747	58.7114	266.567	318.102	52.2112	50.3602
IFNG	Type_II_interferon_signaling	26.9802	8.36836	194.617	9.63963	0	0	3.04551	25.9815	24.0299	6.86617	283.401	25.4438	37.7837	19.865	23.1734	6.35133	89.575	43.0756	16.8026	33.6437	0.607337	158.889	8.03265	225.652
CRTAM	TCR_coexpression	23.9823	26.3	292.21	0	146.268	0	101.311	294.924	235.495	60.3763	0	140.112	11.4701	235.929	46.6228	133.375	587.416	168.888	21.1449	129.297	80.9621	0	96.6985	553.187
POU2AF1	B_cell_marker	369.925	857.34	1470.18	804.359	1048.91	1333.41	714.466	7321.83	1598.81	3153.06	443.86	558.752	514.132	541.522	250.771	456.815	2559.87	2969.6	61.3577	4020.74	338.016	421.331	1297.55	2463
CSF2RB	Cytokine_signaling	739.85	478.78	727.671	327.742	384.776	1576.37	424.479	2198.59	708.889	393.275	520.626	387.428	1283.98	1016.37	825.144	545.261	1527.28	1152.28	165.572	1517.26	705.178	860.461	464.648	790.461
HLA_DMB	Antigen_processing	1778.28	614.862	47.3697	11.7815	2586.69	194.722	27.8926	1316.62	1390.54	1721.55	193.936	1472.7	703.051	26.9399	571.614	59.9834	839.037	824.217	1.51027	75.2033	1217.06	37.2146	1155.44	433.485
LST1	Leukocyte_inhibition	350.14	186.292	35.9557	153.696	0	406.704	65.4031	84.9662	77.6975	116.491	0.288702	0	121.448	324.097	9.10401	6.35133	97.6774	89.8287	19.0681	236.824	224.467	100.64	267.543	64.1125
JCHAIN	B_cell_marker	9765.54	1943.81	2450.68	989.115	2002.94	13145.1	1262.86	14525	6969.54	1472.23	2481.92	790.462	1410.83	3050.76	2674.89	860.233	4538.18	1523.41	125.925	13718.7	1337.89	3120.51	1953.75	4146.39
IKZF2	Lymphocyte_development	278.793	258.816	219.728	23.563	231.92	0	148.76	363.037	632.794	193.441	4.32895	239.853	144.389	208.173	152.283	401.301	251.171	256.878	9.25094	305.431	360.685	403.857	350.649	51.5225
LILRB1	Leukocyte_inhibition	76.7433	209.005	127.842	6.96169	371.599	278.807	124.715	360.228	167.41	380.016	255.407	187.607	91.7613	187.22	107.591	111.734	163.847	411.583	18.8794	237.484	74.89	2.26543	111.528	380.22
IFIT3	Type_I_interferon_signaling	492.234	133.493	531.342	116.744	793.271	1170.55	51.4571	1078.58	674.446	131.881	0	616.086	781.319	1878.18	335.464	68.9222	609.022	421.564	38.7025	332.478	734.324	1320.3	188.454	592.7
CTSS	Lymphocyte_infiltrate	5519.5	1453.47	775.611	1878.09	3866.21	5872.66	1183.67	7955.92	5207.33	982.595	2225.07	2967.12	3432.27	5799.73	3962.95	1268.12	3736.06	1142.56	553.353	1555.52	1118.69	2662.61	1014.87	2810.48
SRGN	Lymphocyte_infiltrate	4247.84	2651.72	2458.67	1521.96	11144	5928.42	1696.48	8713.59	3492.38	1053.15	4467.17	2357.48	7687.01	9808.35	5005.76	2083.42	6638.03	2495.24	1179.39	4859.19	3418.41	9005.56	1815.65	8747.76
HLA_DRA	Antigen_processing	62985.6	12920.5	18198.1	7947.2	79344.2	41713.1	17837.4	64600.9	31373	18713.1	43514.4	34774.9	35606	58883	33436.1	24359.1	49514.5	12799.8	2390.12	18449.9	17806.3	26487.9	26587.5	24447.2
IRF1	Type_II_interferon_signaling	359.733	276.748	2087.13	1310.43	1174.09	560.27	194.446	886.176	362.855	1031.61	0	371.483	582.278	673.229	317.532	624.768	1090.21	893.033	120.073	922.23	548.921	856.254	355.901	1590.03
MAGEA1	Tumor_antigen	0	0	0	0	0	0	0	0	0	0	0	0	0	9.52459	0	0	0	0	0	0	0	0	0	0
CD276	Checkpoint_pathway	274.596	546.522	225.435	649.592	816.99	234.109	800.548	362.335	361.253	1902.45	249.058	456.297	325.212	352.125	405.813	724.505	120.184	428.393	391.18	365.462	525.038	320.044	593.477	209.963
ALOX15B	Macrophage	2515.73	643.752	273.376	1.07117	320.207	986.447	2130.25	1879.79	1340.08	2237.24	3247.56	716.844	234.8	714.319	445.263	1496.53	1041.59	740.955	241.467	399.105	691.212	0	1037.12	445.106
HAVCR2	Checkpoint_pathway	457.46	329.746	1104.35	117.816	914.501	838.635	365.809	638.299	555.096	559.96	310.817	335.183	1321.76	2104.86	547.337	314.501	880.449	638.782	105.158	597.008	897.665	604.814	287.315	1111.6
ICOSLG	Checkpoint_pathway	573.773	576.608	1172.26	1403.08	304.395	1136.47	476.738	879.154	872.294	440.392	1042.41	390.821	483.095	701.802	470.644	609.243	595.068	400.289	268.275	585.135	1125.57	1537.44	472.68	350.585
EGR2	T_cell_differentiation	339.348	792.188	299.058	521.066	881.559	2060.52	584.461	742.225	467.787	617.259	2174.57	301.257	4729.74	4537.08	763.623	410.004	1516.03	1074.27	57.2044	556.109	1813.75	2197.92	949.068	292.089
MMP9	Tumor_marker	481.442	398.684	408.637	402.179	183.164	1323.67	265.14	2058.15	289.964	1103.58	0	221.872	3235.93	555.944	52.1407	888.225	683.293	343.03	619.808	748.075	858.6	290.596	270.324	257.031
PGF	Tumor_marker	77.3427	123.929	88.462	344.878	274.087	0	110.769	193.807	36.8465	520.42	2.02039	536.7	287.428	138.237	252.426	307.445	68.4196	291.024	77.0277	270.468	132.373	36.891	117.398	45.324
CD48	Checkpoint_pathway	954.491	567.243	754.495	160.658	2143.94	3185.49	312.108	1454.26	528.663	715.045	972.278	448.155	434.516	1166.86	252.426	505.978	883.15	446.779	174.256	1244.15	780.472	859.814	355.591	1022.89
IL22	T_cell_regulation	0	0	0	0	0	0	0	7.02183	0	0	0	0	0	0	0	0	0	0	0	0	0	0	0	0
TLR8	Lymphocyte_infiltrate	131.902	24.5067	195.187	16.6013	0	224.373	23.4041	181.869	57.6721	26.5183	0	47.4955	126.171	230.759	69.5206	48.4572	112.982	66.1896	33.6051	0	49.3868	58.5723	73.5281	174.517
TUBB	Housekeeping	4312	2287.3	6412.64	3540.89	8005.18	3676.28	1772.46	4378.21	2278.06	6693.25	1952.64	2078.95	5769.48	4878.87	2375.01	3165.71	2280.8	2812.53	9906.17	4946.93	5982.68	4540.8	3815.43	3863.21
IL18	T_cell_regulation	1311.23	1029.69	836.108	325.599	710.254	2836.31	769.129	1030.13	1147.84	357.049	1838.06	564.519	881.851	2873.6	663.756	802.602	1096.51	1156.74	470.662	980.941	979.638	4369.29	526.127	2398.69
FCGR3A	Macrophage	947.296	1195.45	876.629	348.627	4807.06	1146.21	270.429	2963.28	735.323	1864.56	897.243	440.692	4199.42	3217.84	898.802	824.713	952.919	1203.76	440.454	2321.41	964.863	1632.26	792.435	1210.77
SLAMF7	B_cell_marker	1005.45	173.341	2970.61	365.228	1913.34	1404.22	189.316	2410.65	281.153	322.007	0.288702	427.121	1433.77	922.22	259.323	272.395	2502.26	493.007	134.798	1646.56	405.619	810.95	412.128	1476.33
ITGA1	Adhesion_migration	750.642	1106.59	556.454	925.923	1521.97	983.792	1753.06	2497.72	1243.96	922.692	10858.4	1390.94	1803.51	2156.02	5484.13	5589.28	1802.31	1423.34	224.286	1546.29	2437.96	1722.22	2225	1150.73
KRT5	Tumor_marker	0	12.1539	37.0972	0	0	365.105	191.881	712.031	0	10.8914	0	32.5682	0	9.25215	283.324	73.3914	76.9717	183.597	0	0	80.7596	91.9034	144.585	24.7926
MAD2L1	Proliferation	56.3584	191.87	579.854	733.67	150.22	363.335	127.761	74.433	92.9168	131.644	0	148.254	463.528	120.55	64.8308	133.845	115.683	214.853	400.808	67.9467	307.453	574.396	85.5766	189.819
NCR1	NK_cell_marker	13.1901	24.1084	46.2283	0	0	0	8.17551	0	12.8159	46.4066	0	10.8561	0	0	2.75895	4.70454	28.8082	0	0	0	0	34.302	0	88.5177
ITK	TCR_coexpression	51.5614	238.693	236.85	0	540.268	0	608.346	1280.81	859.478	535.337	1817.57	215.765	89.7366	391.855	298.773	492.57	985.779	448.093	13.0268	691.343	423.835	129.118	299.673	1138.14
STAT4	Helper_T_cells	146.891	384.538	334.443	262.943	502.053	508.492	345.611	654.45	400.503	615.365	56.2763	353.164	452.058	240.828	155.042	269.102	368.204	333.311	17.3691	456.498	460.673	138.826	403.168	368.791
FOXM1	Proliferation	87.5349	396.094	1118.62	605.144	744.515	0	119.425	227.513	160.201	140.641	0	116.364	418.997	96.3311	56.0028	42.5762	127.836	136.056	479.723	171.516	468.769	843.635	59.3168	346.711
ADORA2A	Checkpoint_pathway	121.709	158.996	499.382	76.58	0	338.552	170.882	501.371	173.017	419.556	1023.94	177.091	213.884	157.287	213.252	180.891	203.008	382.691	72.8741	644.506	210.501	421.655	297.202	384.481
BRCA1	Tumor_marker	232.028	162.781	236.279	1146.02	881.559	0.884786	273.155	219.788	470.19	197.466	0	219.158	213.21	77.8268	163.318	141.372	259.274	226.148	217.301	34.9629	629.478	1016.12	189.072	601.61
IKZF3	TCR_coexpression	935.305	180.912	550.747	210.461	1976.59	132.765	188.835	938.139	338.825	383.804	0	318.559	537.747	407.911	190.63	232.406	792.674	278.679	56.8269	515.208	570.174	1096.05	394.518	580.304
MADCAM1	Adhesion_migration	0	79.2987	1.71218	0	0	0	71.4947	124.289	106.534	26.2816	0.288702	0	12.1452	8.97972	16.8283	11.5262	19.3553	27.8417	19.6344	44.1987	14.9779	0	0.309176	11.8151
CD74	Antigen_processing	4130.33	552.499	1188.81	232.954	3115.1	997.953	924.942	2030.06	1089.37	1101.93	2943.1	1861.49	1520.8	6893.93	999.773	1293.76	1835.62	810.296	52.6733	947.298	1367.04	252.734	1204.25	1562.91
TP63	Tumor_marker	16.188	85.8734	14.8389	0	0	0	167.676	156.59	63.2792	0	0	17.9805	47.2298	4.35364	45.5196	0	135.938	0	0	0	0	220.374	0	0
IL2	Checkpoint_pathway	2.99793	2.19158	5.70726	0	0	145.599	0	4.21369	0	0	0	6.10692	2.69911	21.4973	1.65527	6.82165	19.3553	0.525418	0	9.23524	24.2885	0	3.39847	0
MIF	Innate_immune_response	3097.3	1722.65	6178.07	6576.79	5338.11	601.87	1385.01	2643.08	2079.41	2880.54	4874.09	1806.19	3252.79	2914.42	857.421	3384.95	1331.48	2535.95	1426.33	3465.95	1759.5	3140.9	1681.26	3433.21
LCK	TCR_coexpression	0	1.9926	126.129	0	0	0	0	2.10684	0	0	0	0	5.39745	0	0	0	5.85196	0.262528	35.8707	0	0	77.6646	0	0.193724
IFI6	Interferon_signaling	6566.32	1013.75	1135.17	1152.45	2184.79	3977.21	368.213	10456.5	5455.64	1826.68	1343.7	12974.8	6858.47	4183.87	509.542	1701.41	2696.71	600.696	57.0156	1290.99	7786.1	5117.14	1668.9	3838.99
DDX58	Interferon_signaling	1175.73	885.035	1756.11	1158.34	3250.83	4757.43	415.021	2777.9	1494.68	1026.4	1916.85	3208.33	2128.05	1705.11	1499.66	656.524	2564.38	625.123	366.07	1236.24	2419.14	5370.52	951.231	864.839
CD28	Checkpoint_pathway	154.685	89.2606	219.728	51.4102	391.364	632.848	127.28	323.012	116.947	55.1673	0	235.103	309.693	672.14	57.6581	150.311	270.977	170.202	13.2155	162.281	413.512	226.522	127.284	148.175
CD1D	Antigen_presentation	0	102.809	37.0972	88.3615	0	96.476	53.7011	88.4776	170.614	102.758	0	43.7638	33.7358	29.3888	32.829	104.442	58.0667	49.642	7.92942	123.36	47.7672	44.6572	46.0322	25.1801
ID3	T_cell_regulation	82.7385	130.504	111.862	341.129	213.472	178.791	50.1746	153.782	123.355	117.438	98.1223	72.2614	185.547	766.567	226.77	162.308	95.8773	175.455	118.751	87.737	267.781	70.8693	154.162	81.545
IRF4	Interferon_signaling	148.69	190.476	437.174	384.507	25.0369	1444.93	218.331	1369.29	419.726	832.719	0	274.118	250.993	237.29	104.281	174.54	764.316	583.098	114.409	887.267	175.282	211.637	733.118	610.133
NCF1	Chemokine_signaling	386.712	1298.06	1163.13	946.273	2559.02	2851.8	882.782	3117.77	1863.94	3159.46	1314.84	1048.3	1164.56	1576.13	1142.68	991.255	1975.16	2640.75	186.339	2182.22	855.564	853.99	1506.4	1808.32
CD244	Checkpoint_pathway	109.119	154.811	203.177	96.3944	0	0.442821	52.0981	307.564	293.969	139.22	604.03	24.0874	60.7246	38.6409	311.187	19.7592	230.465	147.876	24.1655	355.567	88.6531	92.227	73.5281	456.147
TARP	Lymphocyte_infiltrate	434.677	232.516	409.208	77.1156	230.602	1723.3	32.2206	295.626	101.727	41.1982	277.34	288.027	271.91	418.251	188.699	162.543	530.7	211.964	47.9534	423.513	287.819	775.031	116.471	614.782
TNFSF9	Cytokine_signaling	47.9646	230.324	368.686	24.6342	167.351	285.888	283.093	327.927	277.148	286.018	960.734	301.936	339.381	167.355	83.5904	539.38	262.874	29.943	39.269	170.857	86.8318	557.892	409.038	118.734
CD8A	TCR_coexpression	203.848	389.519	2064.87	267.227	3182.31	1101.51	219.293	973.249	410.916	586.005	0	655.1	365.695	1125.77	147.869	653.701	1277.01	319.128	85.5234	1253.39	294.904	1002.85	296.584	6143.36
TNFAIP8	Lymphocyte_infiltrate	121.709	146.842	224.864	54.6238	50.0738	2.21239	31.5796	332.843	233.093	48.0644	614.997	266.993	404.154	264.23	131.868	128.435	190.854	89.3033	99.1164	31.0046	104.238	373.115	107.82	94.7155
MELK	Proliferation	67.7495	111.376	848.094	400.037	0	413.785	73.5787	153.782	116.146	59.1926	0	149.272	629.508	103.406	65.6584	47.5162	460.03	18.386	913.382	72.5648	507.631	541.389	0	277.175
CXCL9	Type_II_interferon_signaling	298.578	31.0818	3417.49	168.691	2954.34	870.056	30.6176	1810.27	676.849	294.068	0	251.387	550.566	1390.54	218.769	86.3289	3057.26	622.497	55.1276	657.699	84.6049	2883.31	21.626	4068.52
NKG7	Lymphocyte_infiltrate	283.589	549.909	3664.04	801.146	4542.2	407.147	381.358	2077.81	1067.74	2462.64	802.007	1172.46	298.223	500.431	657.963	830.594	1123.07	715.74	288.665	2000.8	246.731	1366.58	809.735	7858.51
IL15	T_cell_regulation	0	109.185	130.695	14.459	0	89.8379	93.7767	126.396	56.8712	122.883	692.052	50.2097	39.1333	92.2491	87.1765	72.4507	73.8212	44.3889	30.3956	94.9936	115.978	84.7845	38.9265	87.7428
CD52	Lymphocyte_infiltrate	5271.88	1095.83	4581.19	384.507	1954.19	10057.9	907.469	4686.48	1293.62	819.224	858.86	1307.49	3597.57	5596.72	3948.61	1326.93	4244.7	880.163	425.351	2661.14	2501.92	6542.61	1007.77	2400.05
IFIT2	Cytokine_signaling	883.144	552.898	367.545	1319.53	1185.95	1182.5	447.402	2586.2	2305.29	697.288	616.44	3224.61	3047.68	2137.24	1182.95	286.038	1211.74	403.441	115.353	443.303	1558.11	2063.94	395.136	1085.65
C1QB	Innate_immune_response	11096.6	4325.75	8862.18	4027.15	39962.7	20053.8	2801.28	15562.8	4365.48	7976.54	12851.4	3758.94	14366	23794.9	5527.44	3239.1	9568.81	4049.91	1242.26	11126.8	6824.48	7890.75	4086.06	11328.1
CCL5	Lymphocyte_infiltrate	402.301	335.724	3924.29	259.73	2901.63	3195.66	222.98	2245.63	745.736	644.724	251.078	978.07	413.6	2369.36	677.55	904.456	1834.27	802.417	190.492	1514.62	463.304	2802.08	763.703	7882.72
CD8B	TCR_coexpression	56.3584	295.078	479.977	1925.75	803.812	1827.74	196.209	672.004	401.304	1050.78	0.288702	528.558	37.1093	177.151	150.076	103.265	396.562	338.039	134.421	516.528	103.429	228.14	133.771	1937.7
PTPRC	Lymphocyte_infiltrate	353.737	352.061	224.294	80.8642	0	3029.71	234.041	938.841	200.251	82.6326	0	337.897	64.0981	446.279	230.356	71.9799	1218.49	156.018	16.0473	533.679	121.038	414.212	182.276	441.62
NFKBIA	T_cell_receptor_signaling	6759.98	6321.76	5283.75	2279.2	5647.77	5840.35	8051.64	10812.5	9477.49	6708.4	4675.53	4556.52	4517.88	6806.85	3509.41	7232.35	5628.84	4941.63	4243.88	4757.6	8380.36	5893.14	5665.06	4527.77
CCL18	Lymphocyte_infiltrate	667.304	467.024	620.946	40.6999	300.441	1222.77	177.775	1865.74	688.864	163.135	445.014	262.922	1275.88	275.387	2141.62	526.913	1468.32	537.921	295.273	251.337	342.064	537.505	75.9995	894.861
LAMP1	Lymphocyte_infiltrate	518.615	196.055	400.647	318.638	486.241	585.496	254.88	825.084	365.258	176.63	480.223	296.169	719.245	1027.8	786.245	537.028	365.053	365.093	248.83	266.51	413.31	292.862	445.803	318.044
CD6	TCR_coexpression	182.265	275.353	597.546	0	1608.94	225.701	201.339	497.859	230.689	392.565	184.124	317.542	184.197	370.63	173.25	217.822	491.539	323.593	100.249	329.179	355.422	457.575	251.169	668.434
PTPN6	T_cell_receptor_signaling	1030.63	1862.32	1185.96	563.908	976.435	2199.04	1587.95	3136.02	1618.03	1095.53	2714.53	1400.78	2220.48	1681.44	1611.39	1331.87	1934.2	1047.48	1162.78	1576.63	1876.09	3238.3	1699.18	1328.54
LEXM	T_cell_differentiation	19.7854	9.76297	11.9852	54.6238	0	0	39.4341	9.83095	51.2642	0	0	42.0678	8.77096	13.0617	21.5181	36.2254	7.20172	43.3384	5.28608	0	19.0262	0	47.8857	89.2926
HLA_DOA	Antigen_processing	475.447	120.143	154.666	217.959	357.104	604.083	598.728	479.602	499.026	221.854	303.314	418.3	240.873	415.53	248.564	220.645	643.682	399.238	49.0862	207.139	139.457	231.7	597.184	568.102
GRAP2	TCR_coexpression	144.493	175.134	401.788	169.761	1263.7	1034.24	365.168	1006.95	571.917	148.455	0	598.784	237.499	376.072	564.441	311.678	663.488	338.827	65.7	545.554	301.583	431.687	234.487	832.686
KRT7	Tumor_marker	7111.91	5381.54	6183.21	319.173	976.435	4502.96	10630.4	4538.32	7026.42	10364.1	2307.32	3460.05	2940.4	4808.12	2426.05	4459.47	2195.72	4344.87	3597.83	7957.7	5295.31	4835.61	8784.13	11515.4
CSF1R	Cytokine_signaling	547.393	503.685	165.509	176.188	1143.79	512.475	326.856	957.098	495.021	352.313	1275.59	328.738	725.992	965.215	379.605	540.321	386.659	357.738	73.2516	312.688	889.366	139.797	483.184	365.499
GZMK	Lymphocyte_infiltrate	127.705	20.5219	152.383	0.535587	624.602	319.08	10.9005	185.381	34.4431	40.9609	0	106.187	79.6161	386.141	27.5876	89.8575	164.747	27.5788	3.02083	146.448	30.1582	99.9932	70.4388	165.801
MAPK14	Innate_immune_response	1860.42	856.942	3253.12	2309.72	934.267	2588.48	1006.7	578.613	633.595	1064.75	1407.19	1480.85	2162.46	1831.38	996.462	1022.07	790.874	765.382	2437.51	1922.3	1871.03	3042.52	1074.5	1872.43
TLR9	Innate_immune_response	74.3448	141.064	53.6477	133.881	77.7456	0	97.9442	370.761	173.818	317.745	0	107.204	122.123	33.7432	69.7966	93.8563	100.378	268.173	169.536	296.855	9.51308	71.193	62.4061	94.3288
HLA_DQB2	Antigen_processing	374.122	15.7401	12.556	0	0	0	303.932	71.6248	154.594	182.786	1012.1	17.3019	8.09656	29.9337	6.6211	104.912	119.284	5.25309	0	6.59676	70.2343	83.49	143.04	0.387447
CD70	Checkpoint_pathway	0	10.7593	93.5985	5.3554	0	0	23.4041	9.12867	0	9.47096	0	0	115.376	27.7565	0	11.0559	31.9593	0.525418	0	19.1309	0	0	0	83.869
CCR2	Helper_T_cells	176.869	127.515	636.355	84.6129	382.14	5.31043	94.4177	627.064	359.651	125.015	0	151.986	138.991	170.892	193.94	105.148	310.138	203.559	5.09734	228.908	214.549	177.335	300.6	263.228
IFITM1	Type_I_interferon_signaling	5045.25	3236.1	6893.75	26859.3	13973.2	4185.65	2952.44	18741.7	10260.9	5063.32	8721.64	15465.9	8732.15	11566.5	4672.78	8922.47	7705.28	6221.55	1208.09	8284.9	8056.72	13816.2	4618.06	8813.8
HLA_DQA2	Antigen_processing	6.59534	10.1613	0	0	0	0	0	0	0	69.137	66.0885	0	0	0	0	27.9923	58.0667	0	0	0	0	0	0.927034	0.387447
CD247	TCR_coexpression	200.85	107.99	277.942	54.0882	744.515	300.492	154.852	452.918	167.41	223.748	384.698	127.22	66.7964	264.775	134.627	174.305	347.948	293.388	27.7525	319.284	170.223	161.155	107.82	590.376
CD79A	B_cell_receptor_signaling	848.37	787.606	692.857	177.259	1998.99	2654.87	376.228	5529.12	1326.46	1624.24	0	433.567	269.21	973.651	128.282	259.693	2003.52	1413.88	0.188747	4687.67	82.9859	467.93	316.665	1205.74
CD27	Checkpoint_pathway	129.504	135.884	142.11	118.351	1333.54	140.289	73.2582	546.311	181.027	389.96	0	88.2062	47.905	124.088	33.6566	79.9781	265.575	86.414	0.188747	453.199	132.778	202.899	109.056	180.134
IDO1	Checkpoint_pathway	235.625	110.579	1829.74	40.1643	154.174	176.578	38.3121	966.929	17.622	171.184	547.754	267.672	251.669	179.6	36.4156	707.569	1604.7	171.515	41.912	402.404	83.9981	275.387	278.048	1094.75
IL10RA	Lymphocyte_infiltrate	937.104	739.19	1927.9	534.99	1913.34	2045.92	913.079	2487.19	1654.08	1314.07	771.993	1039.47	1782.59	2955.78	674.239	1244.83	2301.05	2257.27	362.86	2636.07	1648.59	978.901	860.711	2112.61
C1QA	Innate_immune_response	1927.57	4619.64	1438.79	2707.08	19937.2	7808.82	5402.82	17161.1	9616.87	18651.8	2250.18	3933.99	9825.18	11415.2	7916.25	3655.22	7291.16	4296.01	495.016	5256.32	3025.14	2913.08	2733.2	10061.4
HLA_DOB	Antigen_processing	492.834	301.255	58.2135	1.60676	0	498.313	386.808	1479.53	445.359	379.779	0	489.544	45.8803	140.687	123.317	348.609	938.515	137.107	0.188747	887.267	130.753	419.713	410.892	332.765
CD274	Checkpoint_pathway	161.28	33.4727	1321.79	27.8472	0	371.301	23.4041	199.424	72.0905	226.115	0	60.7268	555.289	124.359	233.39	62.3355	244.869	117.407	0	11.8743	164.96	161.155	36.4551	266.522
ABCF1	Housekeeping	1856.22	2383.54	3591.56	3984.84	2808.07	2246.39	2706.54	2464.02	3798.37	4912.26	1646.15	3196.45	3131.35	2191.94	3210.91	2041.79	2044.48	3097.77	3901.22	3266.73	3938.19	4228.85	3849.72	3320.09
CD80	Checkpoint_pathway	826.785	1098.82	1761.25	774.905	458.568	1975.99	1517.74	2669.76	3276.91	2545.99	4988.37	1335.98	4005.78	1556.26	1217.16	2417.21	1502.98	1789.48	105.724	1043.61	3070.88	962.396	867.817	1920.08
HLA_DPB1	Antigen_processing	7749.84	1355.25	2092.27	402.179	3260.05	6601.98	3256.05	8910.91	3467.55	6061.31	9796.08	3364.72	3721.05	9212.68	1523.38	4476.17	2196.17	1304.09	377.209	3334.01	3764.32	4212.99	5072.2	5760.24
CBLB	T_cell_receptor_signaling	739.25	1527.39	1112.91	1125.14	1964.73	2235.33	3059.52	2861.46	1522.71	2387.35	1801.99	1933.75	1441.86	2262.69	1689.46	1670.36	2317.71	1769.52	956.615	1433.48	1975.87	852.048	897.166	2574.95
IFI35	Interferon_signaling	723.062	670.849	1094.65	947.344	10.5416	361.564	419.51	1456.36	2383.79	1575.94	8.3692	1567.35	871.73	501.52	387.053	526.207	1015.94	587.563	58.1484	880.67	1077.8	906.09	552.387	1719.22
GUSB	Housekeeping	4083.57	1135.08	992.486	861.125	822.26	3149.2	1117.3	1195.85	1445.01	512.133	1185.26	1802.46	1982.31	1618.85	1163.09	997.606	1014.14	1035.92	1545.27	1122.11	2468.93	3073.59	1707.21	1001.59
NT5E	Checkpoint_pathway	1348.4	76.9078	1472.46	556.946	0	82.7571	271.552	446.599	138.574	138.984	355.55	157.075	311.043	604.926	68.969	336.142	94.0766	36.772	65.1338	0	103.226	3071	684.614	28.0853
MAGEA3	Tumor_antigen	0	0	0	0	425.626	0	0	0	0	1.42046	0	48.8526	0	79.7315	0	0	0	49.642	19.8234	0	0	0.647266	0	40.869
TFRC	Housekeeping	2831.1	2187.88	4254.16	7066.26	2738.23	7410.08	2427.61	2734.36	1960.86	1228.36	1814.4	1562.6	5205.42	3973.25	1333.58	1567.57	3732.46	3850.29	2622.15	3845.92	4378.42	2926.35	1766.84	4908.37
IL17F	Dendritic_cell_macrophage	0	0	0	0	0	0	0	1.40456	0	0	0	0	0	0	0	0	0	0	0	0	0	0	0	0
CD2	Lymphocyte_infiltrate	1070.2	494.321	2127.65	317.031	2257.26	6014.72	653.711	2464.02	544.684	513.08	2395.63	923.45	1124.07	1763.89	575.476	636.765	1808.16	729.923	192.758	1050.87	1090.96	2280.43	589.769	2157.74
TNFRSF17	B_cell_marker	141.495	21.3189	472.558	0.535587	158.127	1156.83	10.58	348.993	39.2492	24.1503	0	0	74.893	104.767	17.932	16.2307	257.022	55.9459	0	256.615	28.5392	144.65	92.9913	75.734
HLA_DPA1	Antigen_processing	44.3672	11279.1	8.56089	1610.32	14.4953	29235.4	7.85501	42.8342	21592.7	11.6016	23.0877	27009.7	35.7598	47.349	5600.27	10399.7	11163.2	4793.22	4.5311	222.312	30.5631	18454.8	4.94286	28736.7
KLF2	T_cell_regulation	1053.42	1516.63	937.697	83.5422	1714.36	3643.53	2432.9	1363.67	824.234	1311.47	2685.67	1037.78	298.898	2614.82	954.805	1402.44	2984.79	955.808	90.9982	1316.06	2394.04	854.961	1285.81	819.709
GAGE10	Tumor_antigen	0	0	0	0	0	0	0	0	0	0	0	31.2111	14.1692	0	0	0	0	0	0	0	28.7417	0	0	0
ITGB1	Adhesion_migration	13867.7	8539.33	10468.2	24621.8	36423.2	20880.9	7717.09	13518	5567.79	10609.2	13299.6	7416.78	21367.5	20141.6	13720.4	8543.05	8329.16	7469.7	22538.9	10919.7	13292.7	69149.2	6958.6	12587.9
STAT3	Cytokine_signaling	10675.7	5716.47	3554.46	3760.46	7387.17	9255.08	4761.29	5781.21	6086.84	4206.22	5384.32	4398.09	5293.13	5011.93	6228.99	5471.9	5134.15	4098.23	4215.94	5600.01	7299.93	10355	6286.65	11466.4
ITGB2	Lymphocyte_infiltrate	1127.76	2646.94	550.176	828.993	2361.36	408.918	3018.64	3844.54	2332.53	4441.57	1208.93	2590.21	2799.39	2014.79	1108.74	1977.81	1908.54	1337.71	136.686	2167.04	1891.67	1081.16	2202.75	1786.24
KLRK1	NK_activation	393.308	272.364	1990.11	58.3724	710.254	3660.34	218.972	511.903	375.671	157.689	464.927	242.227	248.969	1348.36	696.034	162.073	1293.22	330.422	281.113	1037.01	426.062	270.856	254.877	1845.12
MAGEC2	Tumor_antigen	0	0	31.9607	0	0	0	0	0	0	13.2589	0	72.2614	0	652.003	0	0	0	0	0	0	0	0	0	0
ITGAX	Dendritic_cell	470.65	1354.45	382.955	290.79	2428.57	1184.71	1245.39	1363.67	869.091	1178.88	0	1131.41	1271.16	1165.5	913.424	1266.94	680.142	1609.56	140.651	715.751	990.366	179.6	478.55	849.15
HLA_F_AS1	Antigen_processing	0	19.7249	33.6728	173.51	0	0	50.4951	21.0665	61.6774	12.3119	0	1.69602	16.8675	6.53084	31.1737	31.0501	13.0537	71.4427	0	0.65989	0	513.882	29.6582	6.00477
OAS1	Type_II_interferon_signaling	902.929	654.91	376.677	898.076	9.22364	2367.21	693.305	1671.94	1038.1	453.178	578.634	1642.33	2057.88	1692.05	236.701	571.371	1167.18	426.817	207.295	806.786	1244.79	1844.86	464.957	806.15
TNFSF14	Checkpoint_pathway	73.1459	248.057	16.5511	162.264	0	0	210.316	89.1789	20.0254	41.435	0	70.2258	7.42217	92.7932	168.284	124.907	200.307	28.1042	0	35.6228	22.6696	0	119.869	813.123
PRF1	NK_activation	39.5709	62.9606	536.479	9.10404	484.923	257.565	25.0071	125.694	80.9012	61.7967	360.456	99.0623	42.5068	161.64	51.8646	155.016	185.903	71.4427	55.8828	213.076	63.7573	0	73.5281	722.862
TOP2A	Proliferation	579.17	616.655	2554.55	3336.86	2053.02	998.839	291.589	863.003	1169.47	427.606	472.142	512.613	3305.42	374.983	202.493	182.773	1245.05	767.746	4756.08	618.778	2516.09	8013.72	396.372	1942.74
TNF	Checkpoint_pathway	88.7338	35.6643	48.5112	0	0	0	11.221	47.7492	88.9116	31.0171	1031.44	25.1048	62.7485	91.4326	29.7945	30.1094	34.6595	9.98113	69.0983	56.0724	48.577	0	14.2112	67.7926
ITGAL	Leukocyte_migration	292.583	418.608	677.448	281.686	1706.45	812.082	424.479	2347.45	1419.38	868.945	1.44298	995.711	392.008	606.287	654.653	563.844	998.832	625.123	126.869	1004.69	852.731	328.457	711.183	1379.68
CXCL10	Type_II_interferon_signaling	297.979	121.936	1558.64	356.124	3870.16	592.576	110.608	2417.67	657.625	925.06	0	655.778	2565.94	1267	169.388	138.079	1663.67	795.062	17.1801	1345.08	603.773	748.171	140.568	1718.44
SDHA	Housekeeping	2199.17	1114.76	1309.24	2546.96	2262.53	924.49	2966.23	2706.28	2281.26	2397.77	2403.42	2232.29	2381.74	1872.74	2304.11	2018.74	2016.12	1218.73	1260.57	1611.59	2321.78	1869.78	1625.34	2207.71
STAT5A	Cytokine_signaling	567.179	321.378	230.001	114.067	606.154	604.083	220.735	1145.99	433.344	470.698	693.206	312.114	559.338	535.535	450.781	445.994	529.8	310.198	69.4758	410.32	619.56	719.046	965.751	836.172
TIGIT	TCR_coexpression	133.101	29.2886	208.313	123.707	383.458	0	49.6936	477.495	161.803	165.975	444.437	102.794	136.292	191.846	30.8981	190.535	318.69	39.9238	0	118.082	94.5228	48.2171	71.3653	360.462
NECTIN2	Adhesion_migration	116.913	255.03	227.147	54.6238	1.31793	157.106	83.1967	84.9662	98.5238	200.071	127.559	96.6877	109.978	80.8197	45.2435	188.889	70.67	86.9394	37.9475	93.6744	193.701	281.858	222.129	135.973
FAS	B_cell_receptor_signaling	1034.23	841.202	797.299	455.196	658.862	1497.15	1160.59	527.352	80.1003	763.583	1783.81	402.016	667.967	894.464	474.782	754.379	665.738	882.79	50.9742	780.399	863.458	1326.77	350.031	649.453
NCAM1	Adhesion_migration	0	208.607	14.8389	0	13.1774	396.968	250.231	82.8593	0	29.1225	168.54	19.6765	37.7837	41.3623	187.319	29.874	48.1635	109.265	12.838	42.2196	198.154	0	29.0403	12.9775
FOXP3	T_cell_regulation	78.5417	133.891	245.411	62.6566	0	0	55.7851	271.751	221.078	407.007	0	242.906	112.677	134.7	67.3137	270.043	151.243	92.455	0	75.2033	30.3606	51.776	85.2679	93.9413
FCER1G	Lymphocyte_infiltrate	5776.71	2400.67	3265.1	1767.77	10945	7944.68	1333.07	8021.22	4133.99	2617.49	3930.09	2139	7587.83	9457.31	2594.61	2017.79	3340.39	2177.42	1387.82	3089.27	2150.14	8221.15	1693.93	4594.01
CCNB2	Proliferation	41.9687	112.373	785.884	262.943	581.117	734.636	68.2886	174.847	166.609	92.1036	0	73.9575	613.315	157.831	61.2442	64.688	321.391	62.5124	1835.83	3.29838	489.617	576.014	39.5444	332.571
CXCR5	Type_II_interferon_signaling	13.1901	65.1522	43.3746	75.5088	0	0	93.1352	331.438	48.8615	84.0531	0	13.5702	29.0127	6.53084	6.89666	29.1683	193.104	100.072	0	0	21.4549	1.9418	25.0245	58.8827
KIR2DL2	NK_cell_marker	0	0	0	0	0	0	0	0	0	0	0	0	0	0	0	0	0	0	0	0	0	0	0	0.968618
KLRB1	NK_activation	1171.53	546.323	650.623	174.581	1996.35	2122.92	127.761	512.605	211.465	180.655	567.667	66.1545	195.667	930.383	122.213	698.866	658.986	258.717	80.237	507.952	953.528	657.886	158.178	334.701
GBP1	Type_II_interferon_signaling	932.907	912.331	6539.91	2204.22	8907.82	4589.26	534.607	9232.52	4196.47	5026.62	1.73168	3597.79	3628.61	2741.9	3626.94	784.254	4477.42	1997.51	536.173	2681.59	1167.87	4865.7	691.102	9987.97
JAML	Lymphocyte_infiltrate	37.7719	237.896	130.124	0	251.685	432.816	176.332	211.362	339.626	158.873	457.424	140.112	86.3631	120.55	268.703	129.376	144.041	185.698	37.0035	513.23	145.124	0	256.421	90.0675
NCR3	NK_cell_marker	36.5729	108.587	109.008	0	0	5.75325	16.8315	162.208	114.544	69.8472	0	92.9554	20.2418	13.0617	22.6218	39.7539	52.2147	0	13.4042	111.485	0	0.647266	63.024	67.7926
AKT1	Tumor_marker	1634.98	1885.23	1323.51	2523.93	886.829	2022.9	2209.28	2359.39	2046.57	1511.3	4441.19	1686.77	1579.5	1603.34	1152.88	2426.15	1313.47	1600.89	1121.43	1456.57	2764.04	3543.78	2937.11	1323.12
GAGE12J	Tumor_antigen	0	0	0	0	0	0	0	0	0	0	0	0	0	0.816547	0	0	0	0	0	0	0	0	0	0
TNFRSF14	Checkpoint_pathway	1590.62	1247.66	1729.29	674.762	1139.83	1867.57	1228.23	2160.67	1392.95	1040.6	1068.09	846.1	1306.92	1353.53	1104.61	1615.32	1411.6	1529.98	238.257	2369.56	2289.4	2213.77	1406.61	1732.2
CD79B	B_cell_receptor_signaling	116.314	53.5963	96.4522	0	0	386.348	19.076	221.895	0	28.1755	0	16.6234	45.2059	79.4599	25.9323	15.0547	119.734	37.0345	0.377494	108.847	14.573	0	24.7153	41.8376
MS4A1	Tumor_marker	148.09	140.864	34.2436	0.535587	376.87	0	74.8612	1023.1	92.1159	67.9527	0.288702	192.357	7.42217	55.5129	12.4146	31.2854	457.329	192.002	0	83.1193	94.3204	106.466	0	71.4727
LYZ	Innate_immune_response	12638	15428.1	5700.95	7432.02	94740.5	48739.1	10058.9	67077.6	33240.9	23418.2	15224.6	17654.5	25911	45234.8	33078.3	16982.4	35993.5	14742.1	3978.25	14113.2	8469.82	22394	21080.3	17254.2
IKZF1	Lymphocyte_development	1308.23	1630.8	1285.84	204.035	5487.01	1741	1732.22	5028.45	3807.98	2154.13	1305.89	2561.71	1084.94	1819.68	1937.75	1539.81	2848.41	1729.07	292.629	2160.45	1755.86	1069.51	2913.63	3239.51
CD14	Dendritic_cell_macrophage	1699.14	2556.48	462.856	970.907	3954.49	1853.85	1329.06	6757.27	2959.71	3479.57	1628.83	2025.69	5560.99	4516.4	1731.95	1721.17	1889.63	1156.22	217.679	2558.23	2069.18	1675.62	1060.29	3271.09
LRP1	Housekeeping	2786.73	2514.44	829.83	4638.18	5738.69	3420.04	2582.46	4004.64	1910.4	4270.86	1607.77	2324.57	3719.7	4318.57	4241.31	3869.05	1584.45	2920.74	728.364	2527.23	3693.07	1402.5	4133.95	1199.35
KLRD1	NK_activation	64.7521	27.2963	1341.77	2.67746	1917.29	647.896	69.7312	102.521	55.2694	94.471	932.163	89.5633	82.3152	308.042	64.5548	151.958	361.452	96.6577	93.075	561.386	35.8254	266.649	109.056	866.195
PIK3CD	PD_1_signaling	232.028	579.397	420.052	79.258	300.441	1556.01	427.685	786.463	970.818	944.238	0	566.894	385.261	322.464	282.497	391.892	394.762	374.549	45.1216	536.978	432.741	393.178	559.802	851.861
CTAG2	Tumor_antigen	0	0	0	0	1021.24	0	0	0	0	0	0	0	0	54.4239	0	0	0	0	0	0	0	0	0	444.913
IDO2	Checkpoint_pathway	15.5886	7.9697	21.6876	0	0	0	0	7.72411	24.0299	27.702	0	0	4.72306	8.16394	0	9.8794	31.509	12.0821	0	0	0	0	24.7153	39.1262
SIT1	Lymphocyte_infiltrate	83.338	106.396	122.134	0.535587	590.341	0	22.4421	240.153	13.6168	223.274	392.779	175.055	58.6999	120.006	32.0014	87.0347	152.143	0	82.3138	310.708	72.8655	84.4609	175.17	276.981
FCRLA	B_cell_marker	65.951	26.4993	21.1169	0	0	395.199	14.267	79.3489	0	0	0	0	8.09656	58.5059	1.93131	0	81.9229	32.044	0	162.94	0	0	0	0
HLA_DQA1	Antigen_processing	969.48	1.9926	27.3949	20.35	3426.09	2811.09	980.086	5286.86	151.39	4770.91	4764.13	2749.32	2749.46	1170.4	788.728	20.7003	1334.63	13.6583	285.833	61.3499	1178.2	1178.24	2171.55	533.818
PSMB9	Type_II_interferon_signaling	436.475	161.586	4015.03	982.153	1188.59	1347.13	282.933	716.243	497.424	449.389	250.212	627.959	625.46	882.218	335.741	365.311	1228.85	487.491	136.875	545.554	487.188	1075.01	429.119	1325.44
CD209	Dendritic_cell_macrophage	52.1615	83.4825	364.692	0	0	519.998	78.8687	703.604	234.694	202.912	788.443	20.0161	568.109	274.571	124.42	89.8575	80.1228	80.8984	0	212.416	174.27	126.853	143.658	92.779
OAS2	Interferon_signaling	875.949	556.684	758.49	763.659	1730.17	1106.82	284.215	1744.26	915.549	1289.45	0	1796.69	1792.04	1320.61	329.671	667.11	1056.45	348.02	59.4699	726.306	1470.47	616.788	492.761	1512.55
CD4	Helper_T_cells	893.336	454.073	211.167	77.6512	9.22364	711.623	275.399	1058.92	456.573	585.058	1328.98	443.405	537.072	936.914	830.385	365.075	672.04	244.271	31.9061	475.628	597.903	306.452	362.697	462.345
CCL2	Lymphocyte_infiltrate	821.39	900.377	485.685	364.157	345.244	659.401	183.706	978.164	411.717	245.057	173.446	289.044	5600.8	1462.11	980.186	239.698	1418.8	256.878	27.7525	232.207	794.236	1118.05	417.38	78.058
BTLA	Checkpoint_pathway	215.84	131.301	182.631	51.4102	633.826	392.543	70.5327	386.912	30.4379	42.382	0	179.126	40.4828	98.2358	83.866	51.2801	376.757	149.189	26.6197	115.444	142.493	337.195	113.69	197.954
IL3RA	Dendritic_cell	283.589	232.317	154.666	129.597	395.318	491.232	107.242	254.196	64.0801	100.153	0	103.812	620.737	355.663	504.852	159.015	445.626	173.091	47.0094	124.679	357.851	0	145.511	125.319
IGF1R	Adhesion_migration	1956.35	1741.18	931.419	1303.47	2407.48	8966.53	3316.97	1588.38	1023.68	1823.37	2430.26	1420.12	1731.99	1602.52	1918.71	1249.54	1473.72	1906.89	11021.4	3929.7	2778.21	3495.24	1186.64	821.646
IKZF4	Lymphocyte_development	19.186	62.7613	28.5363	116.744	0	0	33.1826	33.0033	0	33.1477	0	90.2419	43.8563	18.5043	5.79346	12.2319	22.5065	0	2.83179	0	49.1843	82.8427	43.252	0
FCGR2B	B_cell_marker	121.709	105.2	0	40.6999	247.732	274.382	83.8377	246.472	85.7073	82.8694	0	31.2111	103.231	144.224	42.7606	45.6344	117.933	27.5788	13.0268	163.6	9.71552	0	66.4225	91.0355
MRC1	Dendritic_cell_macrophage	6390.05	3572.62	1879.39	213.675	1048.91	7340.6	4521.48	4633.11	4865.3	4474	2522.61	1682.36	8991.91	5263.92	5164.94	4546.74	5373.62	1693.61	325.48	2874.22	10773.2	2035.79	4381.72	581.466
CD44	Adhesion_migration	1.79841	9.76297	97.5936	0	2.63585	0.442821	0	11.2355	29.637	31.0171	1.44298	117.043	2.69911	17.9602	44.6919	200.18	23.8569	0.525418	1.69901	1.97913	41.2908	71.8402	0	0
CX3CR1	Lymphocyte_infiltrate	2.99764	1.59394	0	0	0	0	2.16401	1.7557	0	0	0	6.27604	1.01197	0.136219	0	0	2.70081	0	0	0	3.23851	14.8855	2.62602	0
LRG1	Neutrophil	547.393	137.278	1.14145	169.226	46.12	68.5953	122.15	247.174	479.001	51.3788	96.6793	186.25	103.231	62.5879	88.8318	212.176	326.342	79.585	6.6079	34.303	90.677	224.257	115.544	94.5225
HLA_A	Antigen_processing	0.59947	2895.99	1611.72	2291.51	11896.4	157.99	0.160495	13844.6	3.2043	0	0	8609.25	10.1205	0.544109	10915.3	0.23538	0.900055	2539.37	2209.82	7582.34	2250.94	10078.6	5688.54	0.387447
CCL17	Chemokine_signaling	612.745	289.898	33.6728	0	0	0	165.431	182.571	336.422	133.301	0	432.549	80.9656	62.5879	196.423	319.441	57.6163	74.5945	0	0	136.219	0	602.745	0
CYBB	Type_II_interferon_signaling	2301.69	2133.09	1605.44	1128.35	2154.48	1531.67	1584.58	5425.19	6347.16	4760.5	1801.99	2007.37	3040.93	6143.69	3699.21	2341.47	3474.98	2460.57	491.429	2387.38	2775.98	1968.16	2716.21	2505.61
CD1C	Antigen_presentation	756.038	137.477	31.9607	0	0	576.202	95.2192	174.847	104.932	11.1282	281.381	78.0287	19.5666	65.3092	222.356	127.965	207.059	32.3068	24.9207	65.9676	414.322	320.691	191.853	0
CEACAM8	Myeloid_marker	8.39375	0	0	0	0	0	0	0	0	0	0	0	0	0	0	0	0	0	0	0	0	0	3.39847	0
ISG15	Type_I_interferon_signaling	1596.61	802.15	1924.48	1362.38	744.515	458.041	236.766	3574.2	3823.2	2103.94	755.543	7278.36	4789.79	2611.01	683.895	692.044	1649.72	565.763	348.323	674.191	3112.17	5089.64	436.843	1454.44
BUB1	Proliferation	204.448	284.319	2802.25	1498.4	1267.65	274.382	149.722	767.504	745.736	101.338	326.113	123.828	1543.75	310.219	65.1068	85.8586	605.872	385.055	2397.11	371.399	1089.14	2527.34	127.593	642.092
HLA_C	Antigen_processing	714.669	1662.28	10741	774.37	5456.7	15041	5515.35	29228.3	14530.2	19675.3	16187.9	24813.1	15326.1	3404.51	3924.88	4891.12	6112.73	6852.72	4625.81	28855.6	43524.9	2117.99	6172.96	18137
TCF7	Tumor_marker	161.28	166.965	147.817	207.784	0	916.082	95.0592	234.534	37.6474	71.9779	100.431	279.885	26.3136	90.6168	138.765	134.316	212.46	179.132	154.055	328.52	144.719	48.8644	123.267	81.9324
LCN2	Innate_immune_response	1318.42	1733.41	621.516	13891.5	2284.94	2739.84	2979.69	5900.58	940.38	155.321	1133.89	1375.34	2205.64	2912.79	1850.57	3395.3	3608.22	2377.57	583.56	1773.87	666.114	10635.2	1150.5	487.138
PTPN11	PD_1_signaling	2897.05	1434.75	2785.7	5425.41	1187.27	1942.8	1809.33	3086.17	1791.85	1382.5	1753.79	1240.65	3195.44	2679.58	2876	1384.32	1746.49	1270.21	2282.7	1020.52	1733.39	9669.92	1290.45	2012.28
CD86	Checkpoint_pathway	402.301	196.254	358.414	190.647	1200.45	595.232	115.417	534.374	351.641	110.098	944.573	181.84	699.003	1093.66	196.423	209.824	304.286	164.949	49.8415	265.191	422.823	742.022	214.714	465.638
MAGEA10	Tumor_antigen	0	0	0	0	1199.13	0	0	0	0	0	0	3.73166	0	9.79626	0	0	0	9.98113	0	0	0	0	9.26837	0
CXCL11	Type_II_interferon_signaling	70.7474	32.0781	284.79	673.691	454.615	0	11.061	310.372	185.833	69.137	0	107.544	367.044	416.618	110.074	0	693.196	139.734	0	106.868	19.6335	490.906	17.9184	279.499
CTAG1B	Tumor_antigen	0	0	0	0	736.609	0	0	0	0	0	0	0	0	47.8931	0	0	0	76.9583	0	0	0	0	0	0
CX3CL1	Type_II_interferon_signaling	327.357	20.7212	35.9557	112.996	869.699	110.196	37.3506	153.782	164.206	89.0253	0	238.496	116.051	70.7518	285.807	142.078	263.774	33.0948	14.9148	0	237.623	326.193	150.455	18.4011
EOMES	Checkpoint_pathway	106.721	7.17273	196.329	72.8314	376.87	0	26.2896	386.912	0	99.4432	0	138.076	71.5195	182.322	72.5551	147.959	209.309	0	0	168.218	86.2244	0	62.4061	212.868
MYC	Tumor_marker	525.21	625.024	1130.6	7198.53	1365.16	642.584	417.426	1068.05	302.78	577.719	920.908	328.738	1918.21	1188.9	546.785	730.621	749.912	391.359	1286.06	352.268	887.544	786.681	523.964	693.421
IFI44L	Interferon_signaling	819.591	359.433	732.237	812.392	1042.32	1057.7	164.79	2212.63	2425.44	491.298	439.531	4755.67	2173.25	2457.53	368.294	515.857	2816.45	687.11	84.0128	576.559	5560.26	2701.77	260.129	1039.94
CCR1	Cytokine_signaling	374.721	163.379	122.134	131.204	1591.81	6.19607	46.8081	770.313	450.966	193.677	944.284	181.162	655.822	552.135	276.703	106.794	130.537	61.987	43.8001	262.552	317.977	179.6	151.69	276.593
SELL	Leukocyte_migration	37.1724	18.131	21.1169	0	150.22	163.302	9.13702	61.7939	20.8263	38.8302	18.7588	15.2663	20.2418	76.1937	10.7593	17.8775	72.0204	12.0821	1.32152	20.4502	42.7073	62.1323	15.1383	33.7026
TLR3	Dendritic_cell	351.339	70.1333	150.671	150.483	1067.36	528.407	28.2131	129.907	7.20885	21.7828	739.67	79.0462	174.076	417.434	220.149	155.721	187.703	44.6518	16.6138	209.777	276.282	331.046	86.5036	53.6528
TBP	Housekeeping	177.468	306.236	659.184	370.583	392.682	914.753	331.665	393.231	199.45	217.355	314.857	171.663	345.453	598.123	259.323	192.417	311.038	372.447	311.32	268.489	503.785	255	185.365	398.814
KLRF1	NK_activation	50.3625	27.2963	0.570726	0	0	269.071	13.786	49.8561	80.1003	44.9861	229.433	31.8896	18.8922	41.0906	72.0035	88.2107	46.8131	11.557	0	19.1309	37.2425	48.8644	0	29.4413
IL7R	TCR_coexpression	2528.32	642.756	834.967	471.798	1745.99	5107.04	472.731	2942.92	1003.66	136.853	1010.37	677.83	1288.7	2984.63	853.559	1194.73	2871.81	489.33	640.198	699.919	1607.7	771.147	510.371	840.434
RORC	Helper_T_cells	2002.51	1141.46	314.468	0	1130.61	2774.35	1764.76	1115.79	2231.6	2860.42	1959.85	1517.48	1014.09	93.3373	532.44	1220.84	232.716	530.304	2530.02	1617.53	307.25	3964.79	4381.41	1549.35
CD53	Adhesion_migration	52.761	138.872	304.766	0	0	1864.47	228.27	816.658	95.3195	166.686	0	96.0092	14.1692	33.7432	18.7596	42.8116	388.46	229.825	0.188747	130.616	56.6736	40.4499	93.6092	208.027
PMEL	Tumor_marker	196.054	28.2926	86.1791	182.078	80.3815	0	121.99	6.31955	103.33	0	0	94.3125	116.051	8.16394	6.06903	147.018	17.5552	39.9238	25.2982	0	116.787	12.9443	125.739	45.9052
GAGE2C,GAGE2A,GAGE2E	Tumor_antigen	13.7896	0	0	0	314.936	0	0	0	0	0	0	0	0	223.684	0	0	0	56.9964	0	0	0	0	0	0
MAPK1	Tumor_marker	4175.9	1795.37	5206.13	2824.36	4007.2	2472.98	1568.23	2087.64	3009.38	1695.51	1573.13	1859.45	2155.04	2376.71	1924.23	2630.1	1506.58	1871.96	1267.56	2008.72	3709.87	10997	2964.6	3202.71
TNFSF10	Apoptosis	1449.12	388.921	366.974	716.533	956.668	1336.51	623.254	1884.7	1898.38	774.948	749.194	1482.2	1284.66	767.111	1602.28	1085.35	1082.11	288.397	55.8828	831.854	1121.73	9982.52	790.581	971.758
IFIT1	Type_I_interferon_signaling	1400.56	147.041	418.91	184.221	880.241	2046.36	61.5561	903.028	578.326	46.1699	0	1369.57	2843.24	1964.72	349.81	191.712	910.608	61.4616	0.377494	60.0307	1782.98	6141.02	36.1459	271.751
HLA_G	Antigen_processing	0	0	9.13162	0	0	181.003	375.267	2.10684	129.763	0	0	0.678546	180.823	0	2.20688	0	224.613	0	0	0	0	110.672	0	8.71623
CMKLR1	Dendritic_cell_macrophage	0	0	0	69.6183	0	0	7.85501	82.8593	0	21.5461	0	11.5346	9.44612	0	0	10.8205	27.0074	0	0	27.0469	0	0	8.95919	35.2524
EGFR	Tumor_marker	4992.49	1678.62	2791.4	980.547	2552.43	3511.2	4811.62	4734.23	6144.51	1341.78	0	10146.4	2004.57	1070.8	2137.48	1747.52	3481.28	265.283	194.834	771.824	9843.75	8245.09	7851.13	1362.24
HLA_F	Antigen_processing	139.097	144.252	390.945	159.051	553.445	624.883	121.669	183.274	139.375	217.828	0.577403	717.862	96.4844	180.145	130.213	244.873	222.813	132.904	50.5965	300.153	159.495	304.834	166.519	296.737
LILRB2	Lymphocyte_infiltrate	93.5308	227.535	179.778	58.3724	496.782	1217.02	94.2577	495.05	156.997	180.892	838.947	241.549	234.8	490.363	361.121	258.282	234.066	532.931	35.4932	277.065	164.555	169.244	114	584.178
CCR7	TCR_coexpression	341.746	132.696	179.778	0	741.88	1985.29	96.5017	422.022	112.141	78.6074	0	152.325	62.0734	253.073	40.5538	104.442	486.137	77.4837	64.1897	83.1193	92.9039	72.4875	114.926	120.477
CLEC4C	Dendritic_cell	0	0	0	0	0	612.491	34.7856	67.4111	12.015	0	0	0	23.6153	5.44262	26.2084	38.8128	10.8032	0.262528	0	0	0	0	0	14.3336
LY9	Lymphocyte_infiltrate	20.9844	9.56364	2.85363	0	0	374.841	19.236	113.054	40.0501	38.12	0	33.5863	6.74701	27.484	17.1043	16.2307	81.4732	0.787945	0	163.6	62.3408	0	22.2439	33.5089
IFNA17	T_cell_receptor_signaling	0	0	4.56581	0	0	0	51.4571	0	0	105.599	0	0	0	0	0	0	1.3504	18.386	0	0	9.51308	0	38	0
PDCD1	Checkpoint_pathway	59.3557	65.7502	167.222	79.258	334.702	0.442821	57.7086	267.538	150.589	385.935	472.431	115.347	54.652	140.687	15.4491	109.617	179.151	148.401	22.0889	190.647	113.347	38.1855	165.902	664.173
EFNA4	Tumor_marker	367.527	623.629	324.17	1059.27	433.531	25.6682	648.742	930.414	875.499	1722.03	624.232	718.54	193.643	216.064	154.49	916.452	205.708	578.895	689.095	444.623	1208.76	1868.49	793.671	698.844
NRP1	Dendritic_cell	2548.11	1398.08	2459.81	1278.83	3200.76	4600.32	2459.51	2476.66	2030.55	1695.75	4401.95	3248.36	5903.75	1819.13	4463.67	2284.78	3048.71	2219.98	571.288	2492.26	3822.41	6309.62	2450.21	951.614
CD47	Adhesion_migration	10401.1	1551.3	11004.7	3946.29	13128.5	6664.38	1982.29	1643.85	1163.86	739.669	4828.78	2263.5	4109.68	2294.26	1592.35	2519.54	2551.77	1491.89	3119.24	3949.49	7403.35	56245.8	1378.19	2276.09
CD3G	TCR_coexpression	971.278	222.155	3121.85	219.03	3212.61	2644.25	321.085	2357.99	956.4	400.141	962.466	695.132	740.161	1603.61	516.163	649.938	2053.03	550.003	222.21	1649.2	688.176	2652.9	334.275	2923.41
ITGAM	Leukocyte_migration	715.868	2052	369.257	250.626	1154.33	455.386	1676.92	1968.27	2375.78	2717.64	1169.97	1085.27	2031.56	1714.37	1630.98	1501.23	857.043	1518.42	227.873	1226.34	1543.54	445.278	1300.33	810.024
TLR7	Innate_immune_response	279.392	53.9946	85.6084	0	310.983	247.828	20.9995	202.936	125.758	25.0979	0	84.8135	186.896	389.134	47.1749	81.6244	133.238	0	0	157.663	145.124	74.7519	30.8944	86.193
PTPRCAP	TCR_coexpression	20.9844	19.5259	6.84871	0	0	0	15.389	16.8528	88.9116	9.7077	0	11.8742	4.04866	2.72131	3.86215	0	8.10242	38.0854	0	21.7694	37.6474	0	17.3005	30.9911
IL13	Cytokine_signaling	0	5.57879	0	0	0	0	2.24401	0	0	2.13069	0	0	0	0	1.65527	2.11711	6.30167	0	0	0	0	0	0	0
GNLY	NK_activation	32.3761	160.191	1120.33	208.319	371.599	798.362	418.067	822.978	711.292	737.065	1574.58	857.635	908.165	317.021	574.924	942.798	690.946	917.985	56.4491	904.419	52.018	330.399	304.616	2828.69
IFITM2	Type_I_interferon_signaling	2464.17	1036.26	781.889	1879.69	2037.2	1040.44	1637.96	1985.82	2018.53	997.275	2561.28	1586.35	2349.35	2229.49	1550.14	2533.42	1606.95	947.14	441.965	1973.76	1724.89	2231.57	2025.42	929.339
KIR2DL3	NK_cell_marker	0	0	12.556	0	0	0	0	0	15.2193	10.1812	0	0	0	0	30.3461	1.88173	1.80075	0	0	0	0.404891	0	0	5.03615
IFNB1	Type_II_interferon_signaling	0	0	0	9.10404	0	0	49.3731	13.3414	0	58.7191	0	0	3.3735	2.72131	2.48291	0	7.20172	10.7691	0	0	7.89351	0	6.79693	0
CXCL13	Type_II_interferon_signaling	1025.24	547.917	3447.73	907.715	6566.23	4534.82	268.346	11040	1353.7	863.736	0	569.608	326.562	1059.1	37.5192	262.516	5301.15	2050.56	477.269	3130.17	149.374	6930.94	185.056	7751.4
IL7	Cytokine_signaling	193.656	71.9266	224.294	1311.5	545.538	209.77	88.9677	62.4961	126.559	105.362	0	233.746	56.6759	115.107	87.1765	181.126	134.138	64.6137	30.2068	129.297	276.89	468.901	197.414	75.9277
BCL6	Type_II_interferon_signaling	1714.73	3011.35	1530.11	1296.51	3374.69	5651.38	3851.89	2616.39	1796.65	2037.4	2949.73	2418.54	2443.81	3154.43	2613.37	2096.36	2021.52	2597.15	2361.99	2902.58	2947.82	4101.03	1396.72	2076.39
CEACAM1	Checkpoint_pathway	750.642	143.255	43.9454	127.455	342.608	339.88	25.1675	252.089	12.015	11.6016	0	125.863	118.075	47.0773	50.761	105.853	111.632	0	83.0691	48.1564	111.525	1285.03	59.9347	79.0266
IL2RB	TCR_coexpression	166.676	228.73	625.512	585.329	955.351	476.185	154.371	929.712	434.946	1208.24	0	614.729	269.21	165.45	154.49	374.014	484.337	328.058	42.6673	408.341	212.323	401.592	420.778	1102.89
RPS6	Tumor_marker	20726	13592.1	21948.3	33787.9	25185.7	17388.3	19228.1	25079.1	6911.07	20314.4	16059.8	10953.5	27845.4	15656.2	15240.7	20473.4	12487.9	10904.5	27401.1	15677.3	18181.6	32425.7	14470.8	15995.2
